# Supplementary material for: Thrombospondin 1 promotes an aggressive phenotype through epithelial-to-mesenchymal transition in human melanoma
Source: PubMed Central journal article supplement (PMC4170613; doi:10.18632/oncotarget.2164), 2014-07-08
Supplement: oncotarget-05-5782-s001.pdf [file oncotarget-05-5782-s001.pdf]

## SUPPLEMENTARY FIGURES AND TABLES

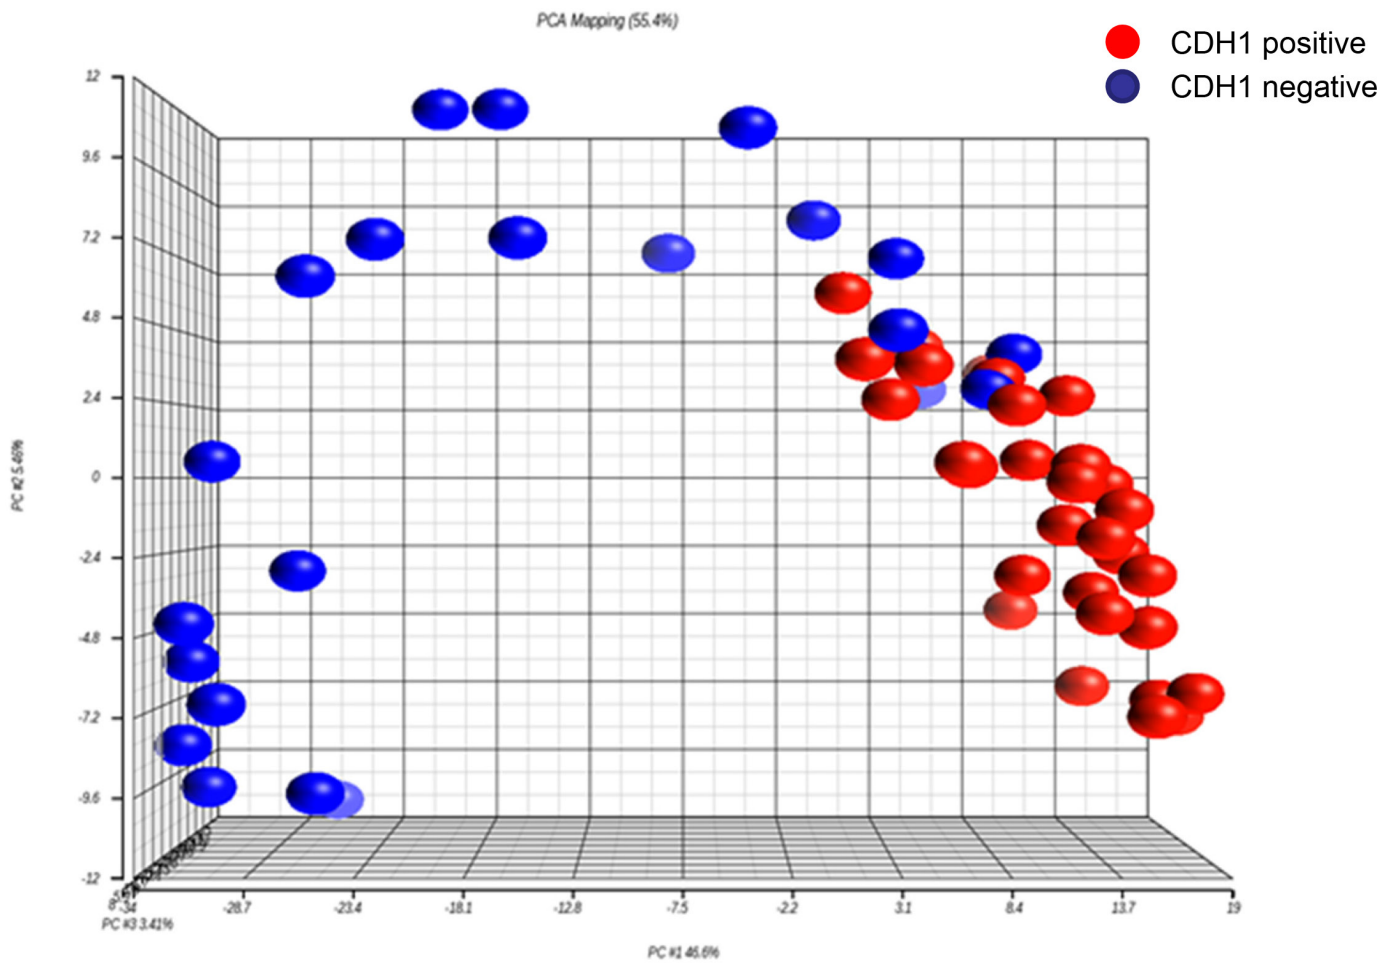

**Supplementary Figure S1: Segregation of melanoma cell lines based on differential gene expression.** Principal components analysis of the genes differentially expressed between 54 melanoma cell lines divided based on presence or absence of E-cadherin (*CDH1*) expression by qRT-PCR.

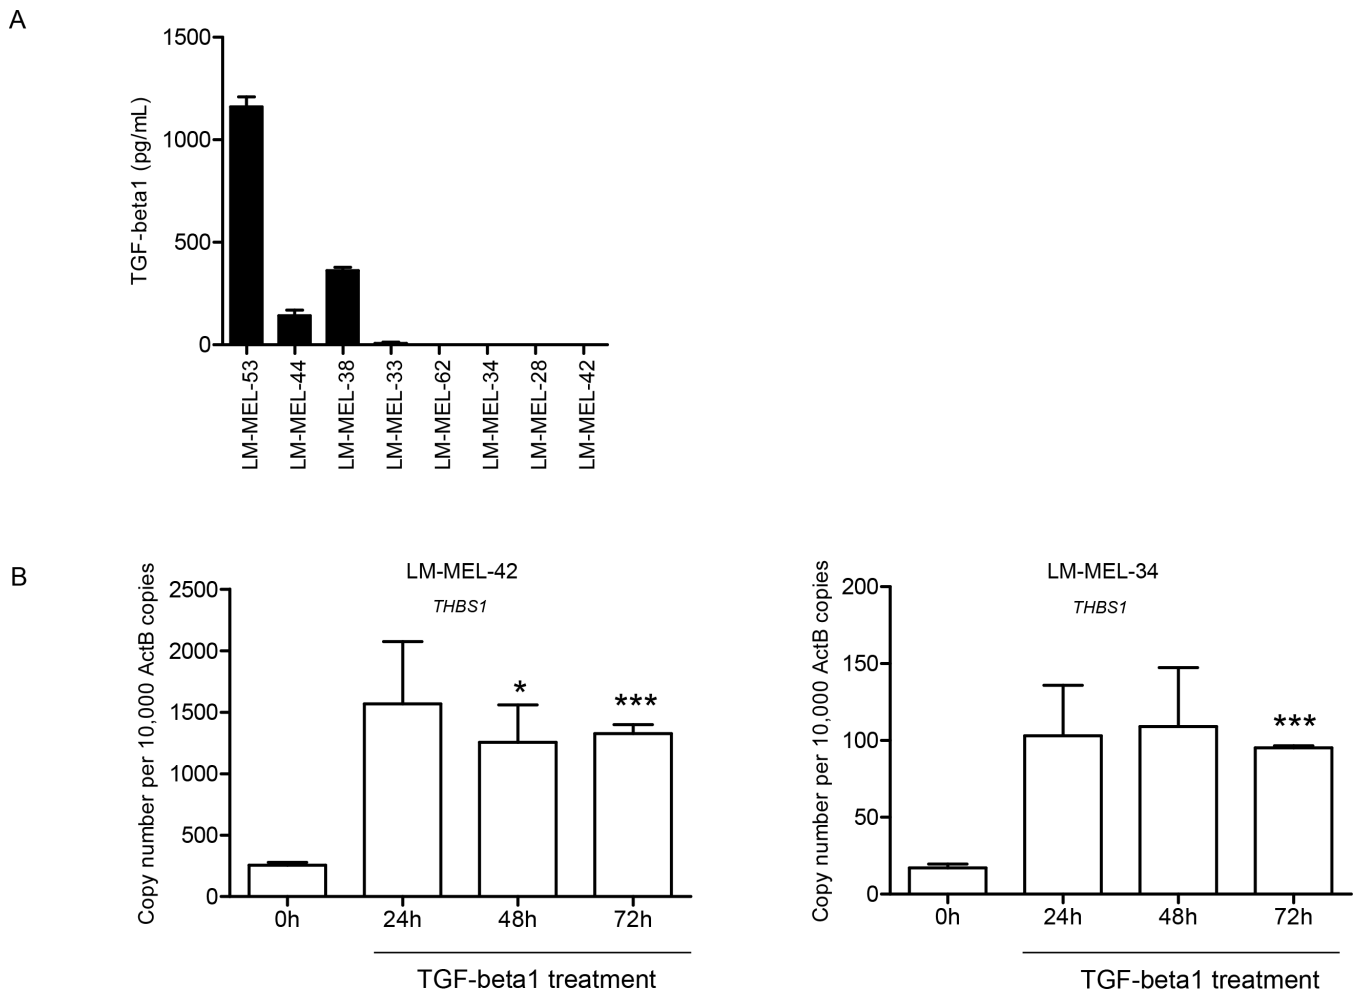

**Supplementary Figure S2: TGF-beta 1 secretion and expression in melanoma cells.** (A) Media from 4 mesenchymal- and 4 epithelial-like melanoma cells were collected and subjected to TGF-beta 1 ELISA, and only mesenchymal-like lines secreted TGF-beta 1. (B) *THBS1* expression was assessed by qRT-PCR in 2 epithelial-like melanoma cell lines; LM-MEL-42 and -34 treated with 5ng/ml of TGF-beta 1 for 24, 48 or 72 hours. Bars are mean values +/- SEM from experiments in triplicate (\* p<0.05, \*\*\* p<0.0005).

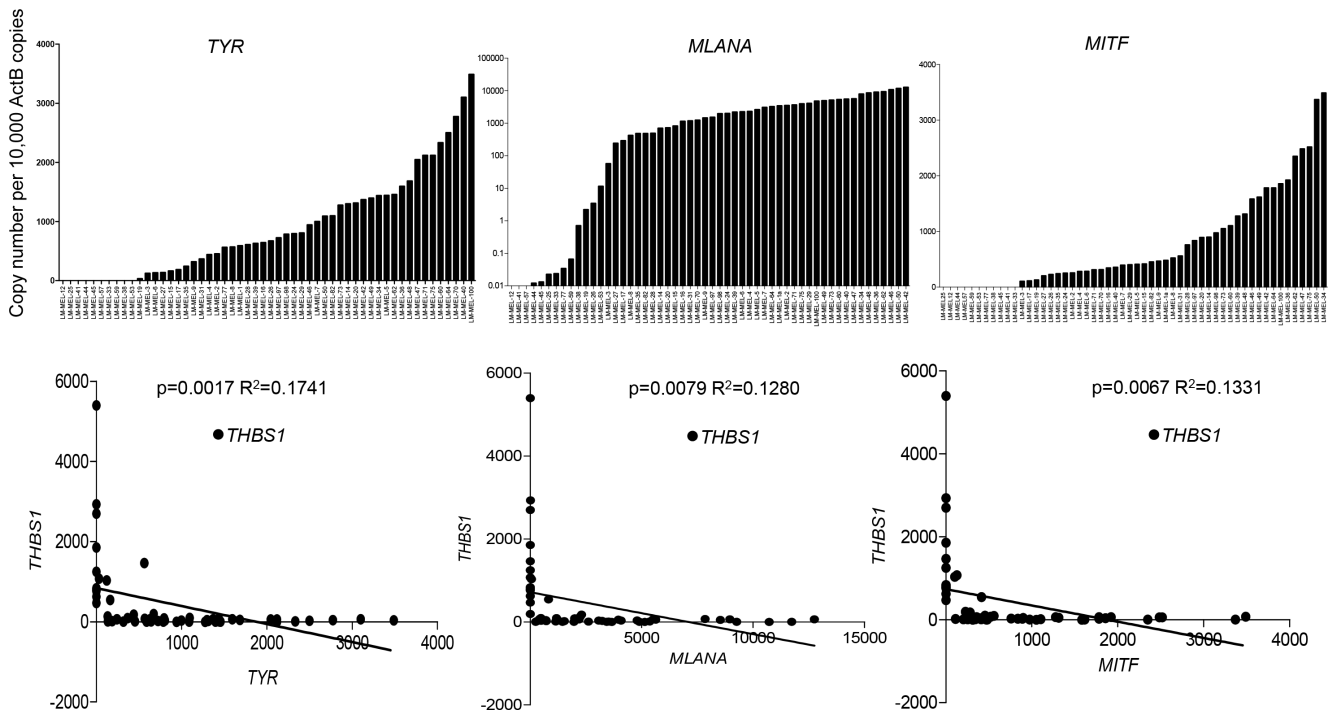

**Supplementary Figure S3: Correlation between *THBS1* and differentiation marker mRNA expression in melanoma cells.** qRT-PCR analysis of *TYR*, *MLANA* and *MITF* in 54 melanoma cell lines. Regression analysis of all the three genes with *THBS1* expression is shown.

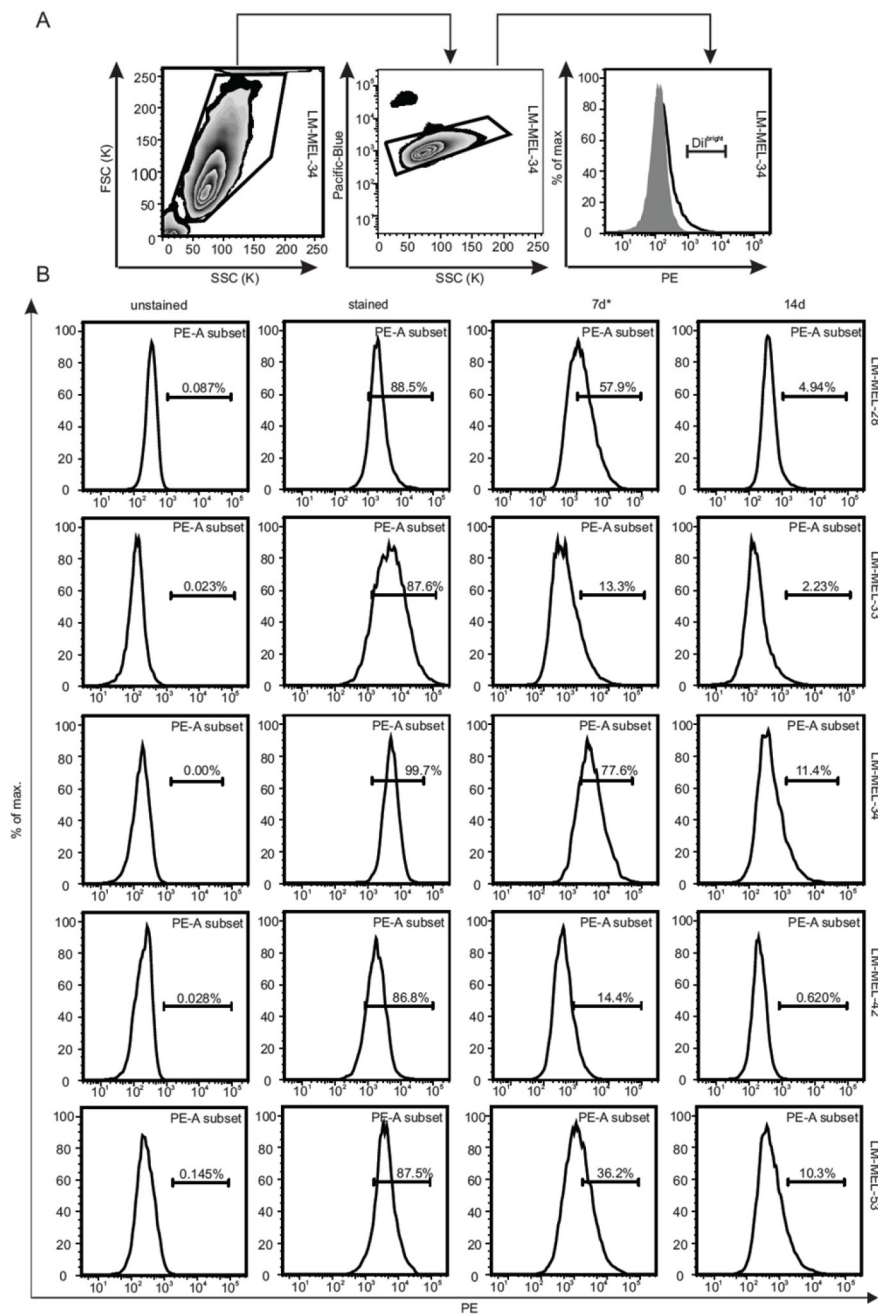

**Supplementary Figure S4: Flow profile of the LRC population in different melanoma cell lines. (A)** Gating strategy for detection of the DiI<sup>bright</sup> population. Cell lines were CM-Dil labeled, cultured and gated based on FSC/SSC; dead cells were excluded using Pacific-Blue viable cell stain and then gated compared to unstained cells (from left to right). **(B)** The indicated melanoma cell lines were stained with CM-Dil and cultured for the indicated time-frame. FACS analysis was performed either with unstained cells (unstained), two hours after labeling (stained), after seven days (7d) or after fourteen days (14d). The \* indicates that LM-MEL-33 histograms have been derived after 8 days. All cell lines were co-stained with Pacific-Blue to exclude dead cells from the analysis.

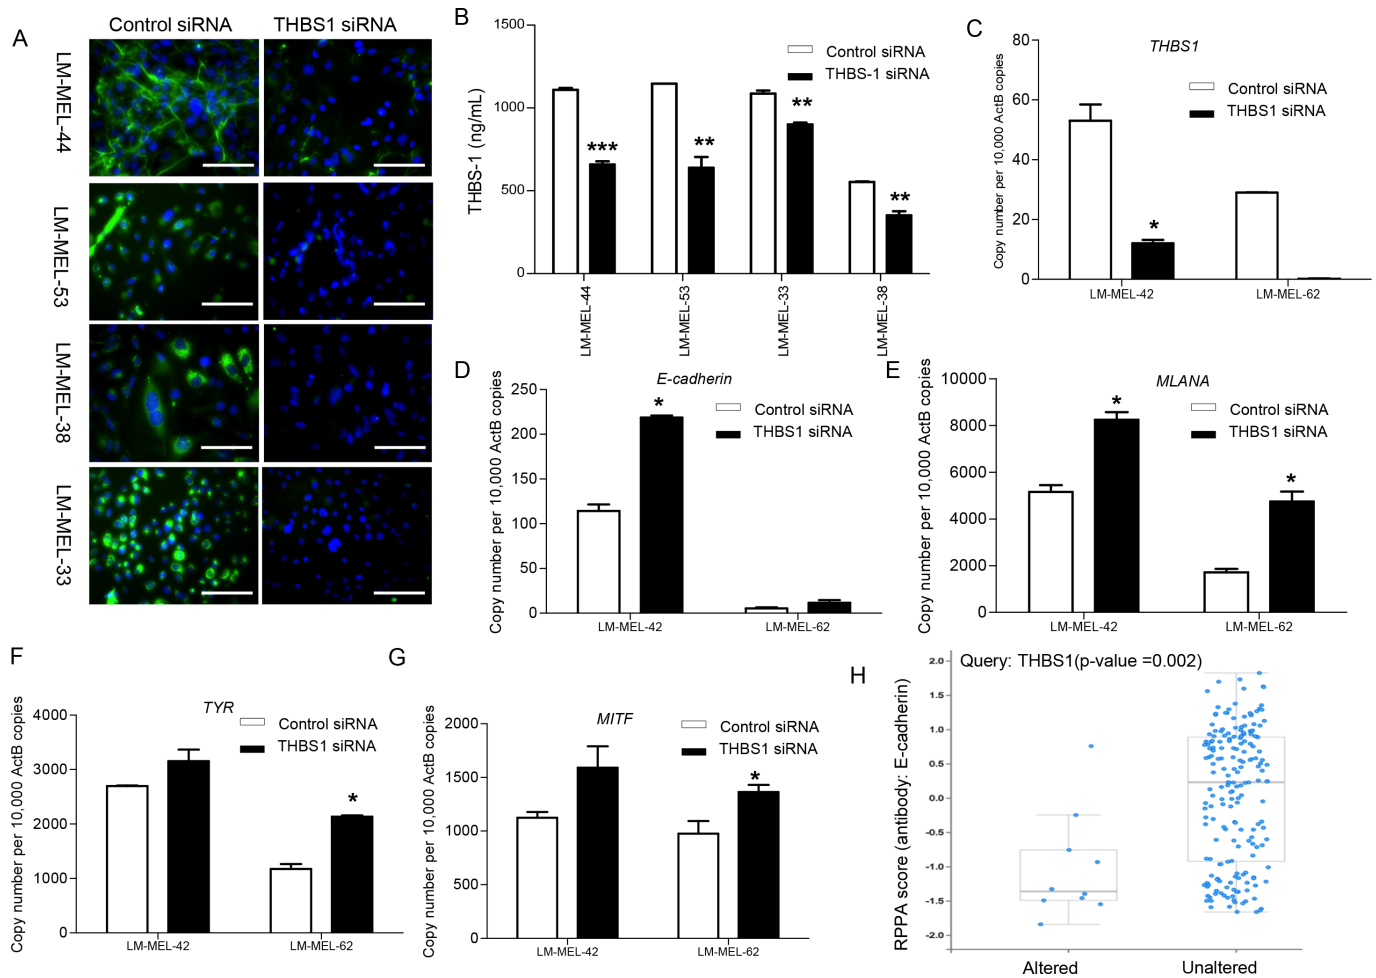

**Supplementary Figure S5: Loss of THBS1 effects E-cadherin and differentiation marker expression.** Melanoma cells were plated out and transfected with either 20nM scrambled siRNA or THBS1 specific siRNA. (A) After 48 hours cells were fixed and stained using a THBS1 antibody in conjunction with an Alexa-488 conjugated secondary antibody (scale bar = 100µm). (B) Simultaneously treated cells were used for THBS1 ELISA. Epithelial-like melanoma cell lines LM-MEL-42 and LM-MEL-62 were treated with THBS1 siRNA and mRNA expression level of THBS1 (C), E-cadherin (D), MLANA (E), TYR (F) and MITF (G) were assessed. Bars are mean values +/- SEM from three independent experiments in triplicate (\* p<0.05, \*\*\* p<0.0005). (H) TCGA obtained dataset demonstrating E-cadherin protein levels in THBS1 altered (high) and unaltered (lower) melanoma patient samples.

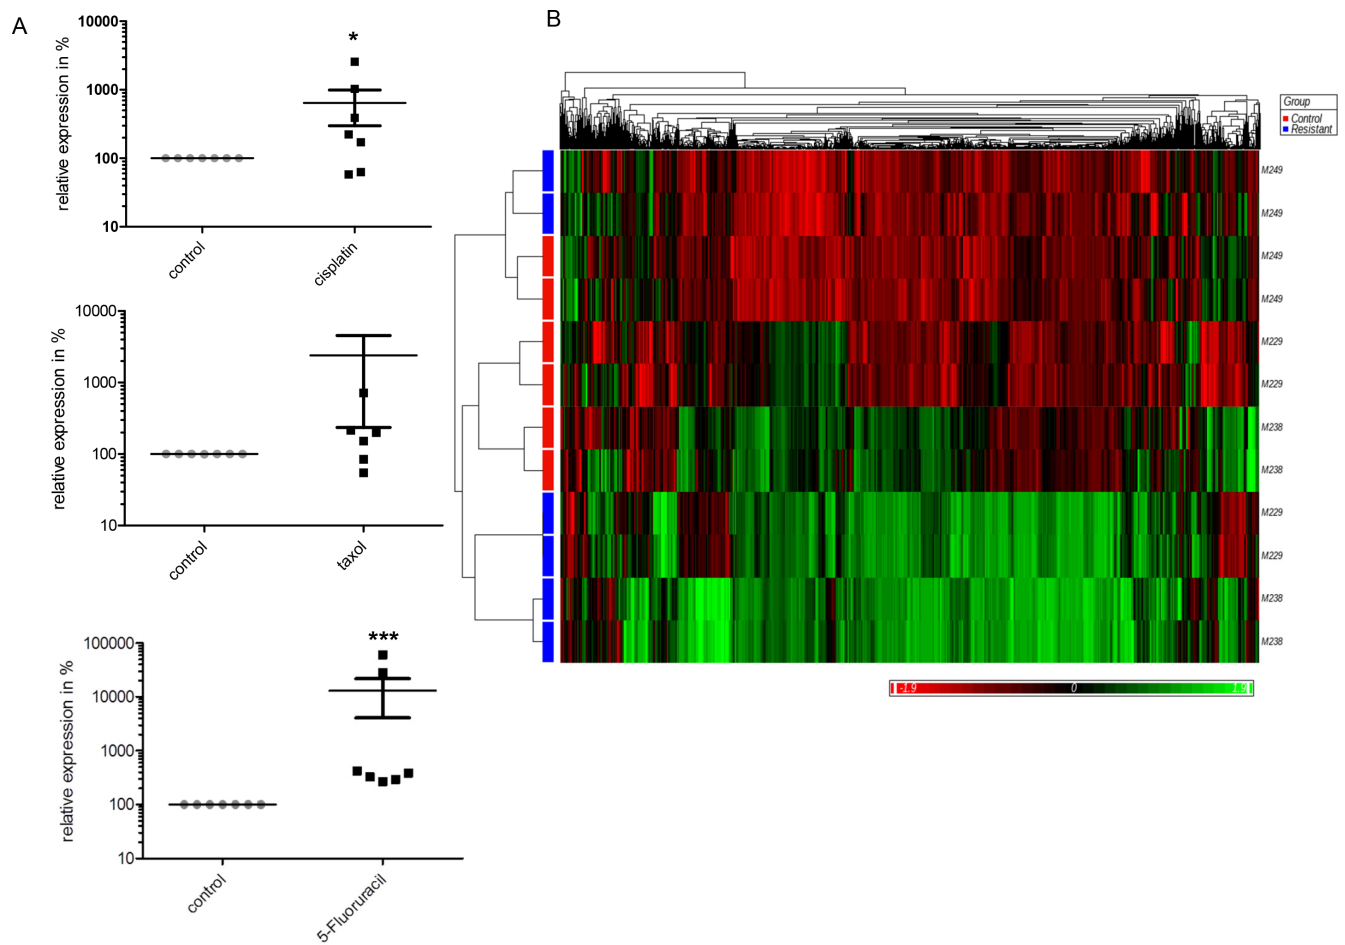

**Supplementary Figure S6: *THBS1* is enriched in melanoma cells with acquired anti-tumor drug resistance and BRAF inhibitor resistance.** (A) RNA was extracted from melanoma cell that survived after a three-day treatment with 40nM taxol, 150 $\mu$ M 5FU or 1 $\mu$ M cisplatin or DMSO (control) and *THBS1* expression was performed by qRT-PCR. Bars show percentage of expression  $\pm$  SEM compared to control (\*  $p < 0.05$ , \*\*\*  $p < 0.0005$ ). (B) Comparison of a publicly available dataset (referenced in the text) of PLX4032 resistant BRAF V600E melanoma cell lines and their sensitive parental lines, based on the gene up-regulated in mesenchymal-like melanoma cells (Supplementary Table S1). *THBS1* was significantly up-regulated in the M229 (mean 2.34 fold) and M238 (mean 1.68 fold) resistant lines compared to the parental lines (*THBS1* probe IDs 7982599 and 7982600; ANOVA FDR cut-off  $< 5\%$ ). M249 did not show a change in expression for *THBS1*.

Supplementary Table S1.

| Symbol       | Probe ID    | p-value     | Fold-Change |
|--------------|-------------|-------------|-------------|
| LOC100134134 | ILMN_337630 | 1.74E-07    | 32.11       |
| AXL          | ILMN_28087  | 1.23E-07    | 22.47       |
| THBS1        | ILMN_182705 | 5.53E-07    | 18.90       |
| AXL          | ILMN_180683 | 8.51E-08    | 18.11       |
| PXDN         | ILMN_165066 | 3.00E-07    | 16.40       |
| FAM20C       | ILMN_5460   | 1.09E-07    | 13.33       |
| COL5A1       | ILMN_31902  | 5.34E-07    | 13.24       |
| CCL2         | ILMN_25185  | 9.67E-07    | 13.15       |
| NTM          | ILMN_169728 | 6.17E-10    | 11.06       |
| C20orf100    | ILMN_17741  | 3.25E-05    | 10.70       |
| TPM2         | ILMN_22618  | 0.000129141 | 10.18       |
| NRP1         | ILMN_17483  | 1.20E-07    | 9.98        |
| HLA-B        | ILMN_18149  | 2.68E-06    | 9.87        |
| ID1          | ILMN_28002  | 4.71E-07    | 9.72        |
| IGFBP6       | ILMN_5216   | 9.40E-10    | 9.66        |
| EFEMP1       | ILMN_41104  | 8.65E-08    | 9.55        |
| C5orf13      | ILMN_2442   | 1.76E-08    | 9.51        |
| COL6A1       | ILMN_179738 | 2.35E-07    | 9.44        |
| BASP1        | ILMN_28962  | 1.12E-05    | 9.34        |
| DKK3         | ILMN_4127   | 0.000355612 | 9.19        |
| FOXD1        | ILMN_182299 | 2.57E-09    | 9.15        |
| COL6A2       | ILMN_21525  | 7.00E-08    | 9.09        |
| COL8A1       | ILMN_10408  | 1.91E-05    | 8.75        |
| DKK3         | ILMN_181104 | 0.000309747 | 8.44        |
| TPM2         | ILMN_22618  | 0.00016883  | 8.34        |
| PMEPA1       | ILMN_13834  | 8.93E-07    | 8.29        |
| LOC652683    | ILMN_36509  | 7.05E-05    | 8.17        |
| SPANXA2      | ILMN_28893  | 0.000124942 | 7.91        |
| SPANXB1      | ILMN_23554  | 0.000118767 | 7.83        |
| SFRP1        | ILMN_21487  | 0.000280032 | 7.81        |
| PMEPA1       | ILMN_13834  | 6.95E-06    | 7.81        |
| CDH2         | ILMN_28694  | 6.21E-06    | 7.42        |
| JUN          | ILMN_7746   | 7.70E-09    | 7.39        |
| TM4SF1       | ILMN_6834   | 0.000306286 | 7.08        |
| WNT5A        | ILMN_164155 | 1.11E-06    | 6.94        |
| HS3ST3A1     | ILMN_21069  | 2.41E-05    | 6.75        |
| NDRG1        | ILMN_24220  | 2.65E-05    | 6.65        |

| Symbol       | Probe ID    | p-value     | Fold-Change |
|--------------|-------------|-------------|-------------|
| VCAN         | ILMN_25778  | 3.07E-05    | 6.64        |
| NPTX1        | ILMN_5048   | 0.000220168 | 6.57        |
| IFITM3       | ILMN_6890   | 7.19E-05    | 6.46        |
| LOC100133171 | ILMN_346604 | 0.000103143 | 6.37        |
| PODXL        | ILMN_24120  | 9.93E-05    | 6.36        |
| LOC387882    | ILMN_23241  | 2.78E-06    | 6.32        |
| IRF1         | ILMN_11739  | 3.38E-06    | 6.24        |
| BGN          | ILMN_6146   | 0.000142392 | 6.22        |
| FER1L3       | ILMN_18562  | 2.98E-07    | 6.16        |
| PLAU         | ILMN_24167  | 0.000114489 | 6.15        |
| FAM171A1     | ILMN_17888  | 5.01E-06    | 6.03        |
| TPM1         | ILMN_14091  | 9.29E-06    | 5.95        |
| LEPREL1      | ILMN_11123  | 0.000183491 | 5.89        |
| CAV1         | ILMN_178269 | 1.39E-06    | 5.89        |
| NPTX2        | ILMN_22638  | 0.000120175 | 5.89        |
| SPOCK1       | ILMN_25886  | 0.000204002 | 5.85        |
| SERPINE1     | ILMN_6244   | 1.90E-05    | 5.82        |
| IL1RAPL1     | ILMN_7989   | 0.000444637 | 5.79        |
| COL6A2       | ILMN_21525  | 3.39E-07    | 5.73        |
| TPM1         | ILMN_8136   | 1.07E-05    | 5.71        |
| ADAM19       | ILMN_12727  | 0.000461085 | 5.69        |
| SPANXA1      | ILMN_9452   | 0.000125831 | 5.67        |
| MYOF         | ILMN_371188 | 3.76E-06    | 5.57        |
| LPAR1        | ILMN_28278  | 4.03E-06    | 5.57        |
| RUNX1        | ILMN_19125  | 1.13E-07    | 5.57        |
| SPANXC       | ILMN_1520   | 0.00013928  | 5.45        |
| PRKCA        | ILMN_24085  | 3.21E-07    | 5.40        |
| KRT80        | ILMN_3629   | 1.34E-05    | 5.39        |
| FER1L3       | ILMN_28913  | 6.59E-06    | 5.34        |
| NRP1         | ILMN_16360  | 8.43E-07    | 5.34        |
| GLIPR1       | ILMN_3517   | 2.53E-05    | 5.32        |
| GBP2         | ILMN_183366 | 0.000134175 | 5.29        |
| GAD1         | ILMN_4673   | 1.67E-05    | 5.26        |
| KIAA1644     | ILMN_45890  | 1.12E-05    | 5.24        |
| ERRFI1       | ILMN_4328   | 0.00021487  | 5.22        |
| TOX2         | ILMN_308609 | 1.85E-05    | 5.22        |
| VASN         | ILMN_31069  | 3.50E-05    | 5.21        |
| RIN2         | ILMN_17838  | 5.63E-07    | 5.20        |

(Continued)



| Symbol    | Probe ID    | p-value     | Fold-Change |
|-----------|-------------|-------------|-------------|
| IFITM2    | ILMN_2038   | 0.000193514 | 5.18        |
| TLE4      | ILMN_14046  | 1.73E-07    | 5.16        |
| FZD2      | ILMN_12499  | 4.56E-07    | 5.12        |
| TAGLN     | ILMN_2335   | 0.000661612 | 5.05        |
| IL1B      | ILMN_27277  | 0.000164867 | 5.02        |
| LOC399959 | ILMN_371215 | 4.16E-06    | 4.98        |
| EFNB2     | ILMN_3827   | 2.89E-06    | 4.96        |
| IL6       | ILMN_6469   | 0.000405885 | 4.91        |
| VEGFC     | ILMN_161973 | 1.10E-05    | 4.90        |
| PTRF      | ILMN_22301  | 0.000488678 | 4.80        |
| NNMT      | ILMN_22529  | 0.000937969 | 4.79        |
| KCNMA1    | ILMN_24236  | 2.43E-06    | 4.76        |
| TFPI      | ILMN_17834  | 1.77E-05    | 4.75        |
| SPANXB2   | ILMN_2518   | 0.00091498  | 4.73        |
| ADAMTS1   | ILMN_11081  | 1.47E-05    | 4.71        |
| GAS6      | ILMN_10723  | 0.00050824  | 4.68        |
| COL8A1    | ILMN_10408  | 7.62E-05    | 4.68        |
| AFAP1     | ILMN_5058   | 4.35E-06    | 4.68        |
| TMEM158   | ILMN_13668  | 0.000335444 | 4.64        |
| ITGA5     | ILMN_165321 | 0.000776225 | 4.64        |
| EFEMP2    | ILMN_42286  | 7.02E-05    | 4.64        |
| COL7A1    | ILMN_24830  | 0.000496306 | 4.64        |
| MYLK      | ILMN_11781  | 9.18E-06    | 4.63        |
| APCDD1L   | ILMN_29515  | 0.000251296 | 4.54        |
| FLJ40504  | ILMN_176567 | 2.40E-05    | 4.45        |
| GAS6      | ILMN_10723  | 0.000627717 | 4.45        |
| TFPI      | ILMN_17834  | 2.22E-05    | 4.45        |
| ANTXR2    | ILMN_165233 | 0.000158199 | 4.39        |
| NUAK1     | ILMN_12806  | 0.000231994 | 4.39        |
| IL7R      | ILMN_137414 | 9.87E-06    | 4.38        |
| SPANXE    | ILMN_3888   | 0.000170825 | 4.34        |
| LDOC1     | ILMN_8953   | 6.82E-05    | 4.33        |
| KRT18P13  | ILMN_344563 | 9.74E-06    | 4.30        |
| CDR2L     | ILMN_26231  | 0.000133274 | 4.30        |
| CPA4      | ILMN_164642 | 0.00036069  | 4.29        |
| PRSS23    | ILMN_22272  | 4.79E-05    | 4.29        |
| PITPNC1   | ILMN_12660  | 2.81E-05    | 4.28        |
| PTPRE     | ILMN_23422  | 1.46E-05    | 4.21        |

| Symbol   | Probe ID    | p-value     | Fold-Change |
|----------|-------------|-------------|-------------|
| SLFN11   | ILMN_2517   | 0.000389881 | 4.15        |
| BCL3     | ILMN_17874  | 7.06E-07    | 4.14        |
| TNFRSF21 | ILMN_9651   | 9.09E-05    | 4.11        |
|          | ILMN_92725  | 0.000436828 | 4.11        |
| STEAP3   | ILMN_28415  | 8.03E-06    | 4.10        |
| COLEC12  | ILMN_4310   | 0.00040579  | 4.09        |
| NTM      | ILMN_169728 | 2.43E-07    | 4.06        |
| SPANXE   | ILMN_3888   | 0.000190895 | 4.03        |
| ANXA1    | ILMN_14184  | 0.000135662 | 4.00        |
| CARD10   | ILMN_28765  | 4.64E-05    | 3.98        |
| CRIM1    | ILMN_10588  | 9.45E-06    | 3.90        |
| GBP1     | ILMN_28413  | 7.99E-05    | 3.89        |
| SMAD3    | ILMN_16351  | 1.13E-05    | 3.89        |
| IRAK2    | ILMN_174255 | 4.21E-06    | 3.88        |
| TSPAN5   | ILMN_8032   | 4.22E-05    | 3.87        |
| MXRA5    | ILMN_29922  | 0.000136814 | 3.84        |
| KCNG1    | ILMN_28652  | 0.000313746 | 3.77        |
| SCG5     | ILMN_6950   | 0.000971664 | 3.75        |
| IFIT2    | ILMN_28123  | 0.000107131 | 3.74        |
| ARHGAP23 | ILMN_162296 | 4.43E-05    | 3.74        |
| TGFB1I1  | ILMN_27048  | 0.00028205  | 3.72        |
| SLC2A4RG | ILMN_11640  | 3.49E-05    | 3.71        |
| TMEM47   | ILMN_2011   | 2.92E-06    | 3.71        |
| SPOCD1   | ILMN_6339   | 0.000205229 | 3.68        |
| PVRL3    | ILMN_2284   | 0.000197657 | 3.66        |
| S100A3   | ILMN_19000  | 1.13E-06    | 3.65        |
| C1orf133 | ILMN_370905 | 0.000215443 | 3.62        |
| ITGA11   | ILMN_26949  | 3.58E-05    | 3.61        |
| LARP6    | ILMN_25584  | 7.18E-05    | 3.61        |
| FLNC     | ILMN_167330 | 0.000539122 | 3.59        |
| ITGA2    | ILMN_12662  | 1.26E-05    | 3.58        |
| PDGFC    | ILMN_13763  | 0.000113346 | 3.57        |
| PAPPA    | ILMN_177957 | 0.000383103 | 3.51        |
| NUAK1    | ILMN_12806  | 2.43E-05    | 3.48        |
| HEG1     | ILMN_306841 | 0.000204586 | 3.48        |
| GPX8     | ILMN_364670 | 2.18E-06    | 3.46        |
| SDC4     | ILMN_24480  | 6.54E-05    | 3.45        |

(Continued)

| Symbol    | Probe ID    | p-value     | Fold-Change |
|-----------|-------------|-------------|-------------|
| RARRES3   | ILMN_1164   | 0.000219272 | 3.45        |
| SORBS3    | ILMN_23885  | 0.000224004 | 3.44        |
| NCAM1     | ILMN_7059   | 0.000251405 | 3.43        |
| SMAGP     | ILMN_22631  | 0.000678242 | 3.41        |
| RRAS      | ILMN_23748  | 5.37E-06    | 3.41        |
| PVRL3     | ILMN_2284   | 0.000291111 | 3.37        |
| TNFRSF11B | ILMN_6495   | 0.000356991 | 3.35        |
| DSE       | ILMN_14589  | 9.43E-05    | 3.34        |
|           | ILMN_71954  | 0.000225806 | 3.34        |
| TMEM45A   | ILMN_30168  | 6.03E-05    | 3.32        |
| SOX9      | ILMN_17599  | 0.000682599 | 3.30        |
| SLC10A3   | ILMN_162950 | 4.17E-07    | 3.29        |
| SRPX2     | ILMN_23854  | 5.48E-05    | 3.29        |
| DUSP1     | ILMN_20700  | 0.000711119 | 3.29        |
| PSMB9     | ILMN_12611  | 0.000840226 | 3.26        |
| LRIG1     | ILMN_3319   | 0.000196562 | 3.25        |
| CAV1      | ILMN_178269 | 1.85E-05    | 3.25        |
| CRISPLD2  | ILMN_7921   | 0.000247317 | 3.21        |
| CYB561    | ILMN_8373   | 3.57E-05    | 3.16        |
| H2AFY     | ILMN_2037   | 4.03E-05    | 3.13        |
| ANTXR1    | ILMN_14947  | 2.10E-05    | 3.12        |
| PDGFRB    | ILMN_25767  | 0.000268609 | 3.08        |
| RRAS2     | ILMN_165732 | 0.000660422 | 2.99        |
| BIN1      | ILMN_22961  | 0.00088286  | 2.99        |
| ECOP      | ILMN_30115  | 0.000103824 | 2.98        |
| CD151     | ILMN_44972  | 2.45E-05    | 2.97        |
| LOC728855 | ILMN_371939 | 0.000360861 | 2.97        |
| LRIG1     | ILMN_3319   | 0.000108921 | 2.95        |
| PLEC1     | ILMN_27233  | 0.000244607 | 2.94        |
| UBA7      | ILMN_22067  | 0.000155014 | 2.92        |
| FHL1      | ILMN_7975   | 0.000447745 | 2.91        |
| ELL2      | ILMN_15317  | 9.79E-05    | 2.90        |
| SMTN      | ILMN_18885  | 0.000408067 | 2.89        |
| CYB561    | ILMN_20474  | 1.03E-05    | 2.88        |
| GBP1      | ILMN_28413  | 0.000178108 | 2.88        |
| SLC25A24  | ILMN_183710 | 4.78E-05    | 2.87        |
| CDH13     | ILMN_26240  | 7.04E-05    | 2.87        |
| DPYSL2    | ILMN_9671   | 1.57E-06    | 2.87        |

| Symbol    | Probe ID    | p-value     | Fold-Change |
|-----------|-------------|-------------|-------------|
| NTN4      | ILMN_29679  | 3.45E-05    | 2.87        |
| CAV2      | ILMN_177870 | 6.30E-05    | 2.84        |
| COL12A1   | ILMN_12229  | 0.000296527 | 2.84        |
| EDN1      | ILMN_28724  | 0.000650459 | 2.82        |
| BDNF      | ILMN_7507   | 0.000238527 | 2.78        |
| FAM113B   | ILMN_9482   | 0.000745868 | 2.78        |
| CCDC102A  | ILMN_12942  | 9.96E-05    | 2.77        |
| STARD13   | ILMN_4466   | 0.000645096 | 2.77        |
| EGFR      | ILMN_164647 | 5.55E-05    | 2.77        |
| SCHIP1    | ILMN_29529  | 0.000921965 | 2.76        |
| C3orf59   | ILMN_14619  | 9.86E-05    | 2.74        |
| SDC2      | ILMN_12108  | 0.000571732 | 2.73        |
| BMP1      | ILMN_6483   | 0.000351816 | 2.72        |
| SLC14A1   | ILMN_10720  | 0.00051494  | 2.72        |
| PPAP2A    | ILMN_5193   | 3.40E-05    | 2.72        |
| TBX3      | ILMN_23090  | 0.000270281 | 2.72        |
| DLX1      | ILMN_164629 | 0.000146461 | 2.71        |
| ACPL2     | ILMN_138667 | 9.44E-05    | 2.70        |
| DDAH1     | ILMN_182204 | 0.000707959 | 2.70        |
| TMEM132A  | ILMN_41781  | 0.000404537 | 2.70        |
| C21orf7   | ILMN_9078   | 1.22E-05    | 2.69        |
| TGFBR2    | ILMN_22189  | 4.79E-06    | 2.69        |
| IL7R      | ILMN_10513  | 9.97E-05    | 2.67        |
| LOC387841 | ILMN_37989  | 0.000238086 | 2.66        |
| TGFBR2    | ILMN_22189  | 8.29E-06    | 2.66        |
| VOPP1     | ILMN_30115  | 3.55E-05    | 2.65        |
| SEMA4B    | ILMN_25258  | 0.000165652 | 2.65        |
| TIPARP    | ILMN_4419   | 1.47E-05    | 2.64        |
| SLC44A2   | ILMN_5176   | 0.000602377 | 2.63        |
| GLIS3     | ILMN_25239  | 0.000114088 | 2.63        |
| PAWR      | ILMN_18537  | 0.000365278 | 2.62        |
| TMEM44    | ILMN_165329 | 0.000311266 | 2.62        |
| SMOX      | ILMN_14770  | 0.0004041   | 2.60        |
| SLIT2     | ILMN_12361  | 0.000373011 | 2.59        |
| ACPL2     | ILMN_7605   | 0.000400906 | 2.58        |
| EML1      | ILMN_8689   | 0.000797292 | 2.58        |
| PITX1     | ILMN_19276  | 0.000707844 | 2.57        |
| TMEM45A   | ILMN_30168  | 6.02E-05    | 2.57        |

(Continued)

| Symbol       | Probe ID    | p-value     | Fold-Change |
|--------------|-------------|-------------|-------------|
| ENG          | ILMN_18184  | 0.000947904 | 2.57        |
| BIRC2        | ILMN_23760  | 0.000171375 | 2.56        |
| EXT1         | ILMN_18298  | 3.49E-05    | 2.55        |
| GAD1         | ILMN_4673   | 2.05E-05    | 2.54        |
| STX1A        | ILMN_11463  | 0.000228726 | 2.54        |
| IRS1         | ILMN_18432  | 0.000818928 | 2.53        |
| EFEMP1       | ILMN_41541  | 0.000952514 | 2.52        |
| PTPRE        | ILMN_23422  | 0.000459091 | 2.52        |
| RUNX2        | ILMN_11767  | 0.000189897 | 2.52        |
| MGC16121     | ILMN_171797 | 0.000242529 | 2.51        |
| AHR          | ILMN_174431 | 0.000640662 | 2.51        |
| SMAD6        | ILMN_169773 | 0.000868132 | 2.49        |
| VCL          | ILMN_26712  | 0.000882981 | 2.49        |
| C17orf60     | ILMN_307137 | 0.000363649 | 2.49        |
| FUT8         | ILMN_12324  | 0.000181522 | 2.48        |
| SSBP2        | ILMN_5320   | 0.000387408 | 2.44        |
| NMI          | ILMN_3552   | 3.46E-07    | 2.43        |
| TRPC1        | ILMN_182033 | 1.71E-05    | 2.42        |
| WNK4         | ILMN_180414 | 0.000475743 | 2.41        |
| ZHX3         | ILMN_6636   | 0.000359101 | 2.40        |
| SLC4A7       | ILMN_163925 | 0.000440965 | 2.40        |
| LOC100133999 | ILMN_347150 | 0.00018259  | 2.40        |
| RILPL2       | ILMN_2260   | 0.000361433 | 2.40        |
| RGS17        | ILMN_25210  | 0.000322783 | 2.39        |
| CCL5         | ILMN_22732  | 0.000919953 | 2.39        |
| FAM176B      | ILMN_3804   | 0.000271883 | 2.37        |
| SPARC        | ILMN_1780   | 0.000261452 | 2.37        |
| COL13A1      | ILMN_507    | 0.000276227 | 2.36        |
| ARHGAP22     | ILMN_15801  | 0.000174159 | 2.36        |
| MEX3B        | ILMN_29516  | 0.000381794 | 2.35        |
| GOLPH4       | ILMN_179486 | 0.000354709 | 2.35        |
| ADK          | ILMN_4107   | 0.000123904 | 2.35        |
| DPYD         | ILMN_19002  | 2.11E-05    | 2.35        |
|              | ILMN_123169 | 3.06E-05    | 2.34        |
| OSMR         | ILMN_165419 | 6.22E-05    | 2.34        |
| UAP1         | ILMN_162883 | 0.000404853 | 2.32        |
| SMOX         | ILMN_14642  | 0.000458511 | 2.32        |
| KLF10        | ILMN_2466   | 4.17E-05    | 2.32        |

| Symbol         | Probe ID    | p-value     | Fold-Change |
|----------------|-------------|-------------|-------------|
| CDK6           | ILMN_178275 | 0.00034469  | 2.31        |
| ASAM           | ILMN_27333  | 0.000229548 | 2.31        |
| PLK2           | ILMN_5648   | 0.000254697 | 2.31        |
| LOC728069      | ILMN_169318 | 0.000676845 | 2.28        |
| LOC643319      | ILMN_41137  | 5.63E-05    | 2.28        |
| GAD1           | ILMN_4770   | 0.000128466 | 2.28        |
| TMEM44         | ILMN_165329 | 4.73E-05    | 2.28        |
| LOC653778      | ILMN_32201  | 8.89E-05    | 2.21        |
| CAMK2G         | ILMN_25332  | 0.000906732 | 2.21        |
| LOC654103      | ILMN_37027  | 0.00067133  | 2.20        |
| CDKN2C         | ILMN_36950  | 2.45E-05    | 2.16        |
| ULBP2          | ILMN_27661  | 0.000222377 | 2.15        |
| COL13A1        | ILMN_25843  | 0.000337238 | 2.15        |
| P4HA2          | ILMN_9080   | 0.000670117 | 2.13        |
| ZNFX1          | ILMN_176843 | 0.000215938 | 2.12        |
| FN1            | ILMN_20090  | 0.00086466  | 2.11        |
| TAGLN2         | ILMN_14546  | 1.37E-06    | 2.11        |
| TRAM2          | ILMN_26252  | 0.000323518 | 2.11        |
| PLP2           | ILMN_21868  | 0.000914472 | 2.10        |
| CAPN2          | ILMN_24443  | 0.000837345 | 2.10        |
| NR2F1          | ILMN_177945 | 0.000670925 | 2.10        |
| LOC493869      | ILMN_7364   | 0.000538336 | 2.10        |
| LEPRE1         | ILMN_165693 | 0.000186912 | 2.09        |
| NFKBIA         | ILMN_6745   | 2.51E-05    | 2.06        |
| ARSJ           | ILMN_24631  | 3.85E-05    | 2.05        |
| CDC42EP1       | ILMN_9329   | 0.000185168 | 2.05        |
| TMEM189-UBE2V1 | ILMN_20084  | 0.000416263 | 2.03        |
| PDLIM7         | ILMN_28275  | 4.81E-05    | 2.03        |
| NRIP1          | ILMN_4339   | 6.23E-05    | 2.01        |
| BIRC2          | ILMN_23760  | 0.000209075 | 2.01        |
| FYN            | ILMN_25662  | 0.000242352 | -2.01       |
| CDC16          | ILMN_175130 | 6.99E-06    | -2.02       |
| WDSUB1         | ILMN_9810   | 0.000392264 | -2.02       |
| SLC25A13       | ILMN_162783 | 2.62E-06    | -2.03       |
| C21orf91       | ILMN_19108  | 0.000133742 | -2.03       |
| MYO9B          | ILMN_25414  | 0.000125509 | -2.04       |
| STRADB         | ILMN_24336  | 9.93E-05    | -2.04       |

(Continued)

| Symbol   | Probe ID    | p-value     | Fold-Change |
|----------|-------------|-------------|-------------|
| GBA      | ILMN_28933  | 0.000419869 | -2.05       |
| SDHC     | ILMN_14364  | 1.06E-05    | -2.05       |
| CCDC43   | ILMN_306768 | 0.000204178 | -2.05       |
| ST7      | ILMN_15870  | 0.000138737 | -2.06       |
| CLCN7    | ILMN_8600   | 1.31E-06    | -2.07       |
| C12orf5  | ILMN_183781 | 2.02E-05    | -2.07       |
| CHMP1B   | ILMN_27331  | 3.55E-05    | -2.07       |
| PPFIA1   | ILMN_28981  | 0.000582279 | -2.08       |
| C5orf32  | ILMN_11272  | 0.000517774 | -2.08       |
| SLC3A2   | ILMN_12826  | 2.14E-08    | -2.08       |
| CHKA     | ILMN_28401  | 1.97E-05    | -2.09       |
| CDC16    | ILMN_175130 | 9.49E-07    | -2.09       |
| SEC11C   | ILMN_29023  | 2.67E-09    | -2.09       |
| RPAP1    | ILMN_22842  | 0.000894721 | -2.10       |
| HSPA4    | ILMN_166427 | 0.000926623 | -2.12       |
| DUSP22   | ILMN_15436  | 0.000635356 | -2.13       |
| EPS15    | ILMN_183380 | 0.000394287 | -2.13       |
| IDH3A    | ILMN_3303   | 0.000266058 | -2.13       |
| SGK      | ILMN_2451   | 5.27E-05    | -2.13       |
| YOD1     | ILMN_19081  | 0.000220719 | -2.13       |
| PPFIA1   | ILMN_28981  | 0.000483093 | -2.14       |
| SEH1L    | ILMN_177006 | 0.000684094 | -2.15       |
| SLC22A23 | ILMN_356887 | 0.000527871 | -2.15       |
| GNPTAB   | ILMN_5374   | 0.000511113 | -2.15       |
| SCARB1   | ILMN_5375   | 2.84E-05    | -2.16       |
| FAHD1    | ILMN_2449   | 6.58E-06    | -2.18       |
| PAFAH2   | ILMN_3410   | 0.000189882 | -2.19       |
| MRPL44   | ILMN_16607  | 2.50E-05    | -2.20       |
| FASTKD1  | ILMN_5271   | 0.000911014 | -2.20       |
| SPIRE1   | ILMN_2975   | 3.47E-06    | -2.20       |
| NIN      | ILMN_172996 | 0.000375173 | -2.21       |
| CHD7     | ILMN_29669  | 0.000765999 | -2.22       |
| SAPS1    | ILMN_21557  | 0.000568904 | -2.22       |
| ZNF654   | ILMN_6649   | 0.000215631 | -2.22       |
| ZEB2     | ILMN_14685  | 0.000334629 | -2.22       |
| FBXO2    | ILMN_166168 | 0.000649004 | -2.24       |

| Symbol    | Probe ID    | p-value     | Fold-Change |
|-----------|-------------|-------------|-------------|
| TMEM199   | ILMN_3696   | 7.18E-05    | -2.24       |
| NAB2      | ILMN_17333  | 2.26E-05    | -2.24       |
| BACE2     | ILMN_12258  | 0.000914343 | -2.26       |
| ATP6V0A2  | ILMN_23163  | 0.000106488 | -2.26       |
| TOMM40L   | ILMN_42128  | 0.000414352 | -2.27       |
| SGK1      | ILMN_2451   | 6.27E-05    | -2.27       |
| LOC730167 | ILMN_342323 | 0.000269087 | -2.28       |
| TBC1D14   | ILMN_165668 | 8.99E-05    | -2.29       |
| MAP3K11   | ILMN_23190  | 9.83E-05    | -2.29       |
| SLC31A1   | ILMN_28027  | 4.76E-07    | -2.29       |
| RETSAT    | ILMN_28492  | 0.00037606  | -2.29       |
| TMEM170B  | ILMN_339531 | 0.00050239  | -2.31       |
| C12orf49  | ILMN_20444  | 0.00034345  | -2.31       |
| CDC16     | ILMN_28112  | 1.36E-06    | -2.32       |
| MARS2     | ILMN_19018  | 4.25E-06    | -2.33       |
| VAT1      | ILMN_26285  | 0.000163    | -2.33       |
| SLC25A4   | ILMN_2485   | 6.11E-06    | -2.33       |
| EXOC2     | ILMN_172388 | 6.35E-05    | -2.34       |
| GGA2      | ILMN_17168  | 0.000621985 | -2.34       |
| SNX30     | ILMN_309807 | 0.000701473 | -2.34       |
| SGK1      | ILMN_2451   | 9.43E-05    | -2.35       |
| USP48     | ILMN_163754 | 6.74E-06    | -2.35       |
| STXBP1    | ILMN_182537 | 0.000967824 | -2.35       |
| ZNF689    | ILMN_14716  | 0.00028809  | -2.35       |
| ZBTB24    | ILMN_6521   | 5.61E-07    | -2.36       |
| EXOC2     | ILMN_172388 | 0.000313823 | -2.37       |
| ACSL3     | ILMN_416    | 0.000286463 | -2.37       |
| DUSP22    | ILMN_15436  | 6.40E-05    | -2.37       |
| FCGR2B    | ILMN_27581  | 0.000272575 | -2.37       |
| NAP1L5    | ILMN_5355   | 0.000456444 | -2.38       |
| FABP5L2   | ILMN_177732 | 0.000172346 | -2.38       |
| HAGH      | ILMN_22401  | 5.84E-05    | -2.38       |
| C17orf63  | ILMN_173887 | 1.66E-07    | -2.41       |
| FAM195A   | ILMN_9509   | 0.000226578 | -2.41       |
| GAS8      | ILMN_26809  | 0.000102631 | -2.41       |
| DAAM1     | ILMN_183695 | 0.00060562  | -2.41       |

(Continued)



| Symbol    | Probe ID    | p-value     | Fold-Change |
|-----------|-------------|-------------|-------------|
| IVNS1ABP  | ILMN_26781  | 4.19E-05    | -2.43       |
| MESDC1    | ILMN_18570  | 9.25E-05    | -2.43       |
| MYCBP2    | ILMN_7642   | 0.000432138 | -2.44       |
| C15orf39  | ILMN_18382  | 0.000237453 | -2.45       |
| SLC43A3   | ILMN_165230 | 0.000456408 | -2.45       |
| ME2       | ILMN_176679 | 3.47E-05    | -2.46       |
| FLJ38482  | ILMN_2215   | 1.89E-05    | -2.47       |
| FABP5     | ILMN_27564  | 0.000340688 | -2.48       |
| VEGFB     | ILMN_15862  | 0.000351163 | -2.49       |
| ZNF697    | ILMN_174344 | 0.000130113 | -2.50       |
| SLAIN1    | ILMN_165142 | 0.00039226  | -2.50       |
| MSI2      | ILMN_525    | 3.22E-05    | -2.52       |
| PIK3CB    | ILMN_22394  | 0.000190395 | -2.52       |
| LOC731007 | ILMN_176314 | 0.00064071  | -2.54       |
| FASTKD2   | ILMN_12269  | 0.000125027 | -2.54       |
| AGA       | ILMN_165746 | 0.000253853 | -2.54       |
| UBL3      | ILMN_25010  | 2.88E-05    | -2.55       |
| ABHD6     | ILMN_9952   | 1.25E-05    | -2.55       |
| HS1BP3    | ILMN_1874   | 0.000126476 | -2.56       |
| THNSL1    | ILMN_10160  | 7.16E-05    | -2.56       |
| IVNS1ABP  | ILMN_26781  | 6.20E-07    | -2.56       |
| ZNF280B   | ILMN_19056  | 0.000124126 | -2.57       |
| ZADH2     | ILMN_5633   | 0.000249744 | -2.58       |
| EN2       | ILMN_171364 | 0.000374559 | -2.58       |
| STX3      | ILMN_18859  | 1.17E-05    | -2.59       |
| SLC39A6   | ILMN_170037 | 2.08E-07    | -2.60       |
| IDI1      | ILMN_20349  | 0.000707879 | -2.60       |
| CYBASC3   | ILMN_28843  | 0.000131069 | -2.60       |
| USP48     | ILMN_29650  | 0.000120015 | -2.63       |
| ANKRD28   | ILMN_161875 | 8.31E-05    | -2.63       |
| PRR5      | ILMN_5791   | 0.000480657 | -2.63       |
| LOC654244 | ILMN_31329  | 1.22E-05    | -2.66       |
| BAMBI     | ILMN_8469   | 0.000107735 | -2.66       |
| VAC14     | ILMN_30132  | 1.34E-05    | -2.68       |
| PLEKHG3   | ILMN_28109  | 4.25E-05    | -2.69       |
| TMEM192   | ILMN_307671 | 2.57E-06    | -2.69       |

| Symbol    | Probe ID    | p-value     | Fold-Change |
|-----------|-------------|-------------|-------------|
| NARS2     | ILMN_13605  | 1.48E-05    | -2.71       |
| PAG1      | ILMN_20316  | 0.000791062 | -2.72       |
| C14orf109 | ILMN_307789 | 1.99E-08    | -2.72       |
| CHKA      | ILMN_28401  | 1.52E-05    | -2.73       |
| MIPEP     | ILMN_24370  | 5.99E-05    | -2.75       |
| QPRT      | ILMN_21680  | 0.000323818 | -2.76       |
| CDS2      | ILMN_18323  | 1.11E-06    | -2.76       |
| PTPRM     | ILMN_19957  | 8.59E-05    | -2.77       |
| PLD1      | ILMN_20063  | 9.36E-05    | -2.79       |
| SYNGR1    | ILMN_20235  | 0.000850295 | -2.80       |
| STOM      | ILMN_183628 | 5.58E-05    | -2.82       |
| KIAA1598  | ILMN_4741   | 0.000208839 | -2.82       |
| LOC440731 | ILMN_36463  | 5.89E-06    | -2.83       |
| ACSL1     | ILMN_12367  | 0.000430032 | -2.84       |
| LOC729009 | ILMN_347545 | 0.000950114 | -2.85       |
|           | ILMN_91344  | 0.000357348 | -2.87       |
| FTHL3     | ILMN_27691  | 0.000637655 | -2.87       |
| RPS6KA5   | ILMN_13156  | 0.000311936 | -2.88       |
| AVPI1     | ILMN_9920   | 7.69E-07    | -2.88       |
| SLC25A4   | ILMN_2485   | 2.10E-05    | -2.88       |
| SMPDL3A   | ILMN_16204  | 0.000492497 | -2.88       |
| RANBP10   | ILMN_21091  | 3.43E-06    | -2.89       |
| MGC13057  | ILMN_13440  | 0.000455491 | -2.90       |
| POLR3G    | ILMN_13297  | 8.38E-06    | -2.91       |
| SLC7A5    | ILMN_25446  | 6.96E-07    | -2.91       |
| PSEN2     | ILMN_4951   | 4.25E-06    | -2.93       |
| P2RX4     | ILMN_25537  | 6.31E-05    | -2.93       |
| SLC3A2    | ILMN_12826  | 0.00014587  | -2.94       |
| AMDHD2    | ILMN_26534  | 5.52E-05    | -2.95       |
| CPEB1     | ILMN_183191 | 1.60E-05    | -2.96       |
| C14orf109 | ILMN_307789 | 3.16E-07    | -2.96       |
| BCL2      | ILMN_171007 | 3.49E-05    | -2.96       |
| PAG1      | ILMN_174074 | 0.000391055 | -2.96       |
| MOAP1     | ILMN_165500 | 8.20E-07    | -2.97       |
| LOC389599 | ILMN_165271 | 6.45E-05    | -2.98       |
| HAGHL     | ILMN_15715  | 0.000154931 | -2.99       |

(Continued)

| Symbol    | Probe ID    | p-value     | Fold-Change |
|-----------|-------------|-------------|-------------|
| RTN4R     | ILMN_13643  | 5.03E-05    | -2.99       |
| IRF4      | ILMN_12414  | 0.000123787 | -2.99       |
| DSTYK     | ILMN_370446 | 0.000175241 | -2.99       |
| FIG4      | ILMN_20404  | 3.94E-05    | -3.01       |
| ABCC2     | ILMN_9691   | 0.00054703  | -3.01       |
| ENOSF1    | ILMN_12398  | 9.77E-06    | -3.01       |
| TGFBRAP1  | ILMN_30176  | 0.000126304 | -3.01       |
| FAM53B    | ILMN_26314  | 0.000969088 | -3.01       |
| MYO10     | ILMN_28857  | 3.80E-05    | -3.02       |
| SLC11A2   | ILMN_10129  | 6.52E-05    | -3.03       |
| METTL9    | ILMN_22037  | 0.000183645 | -3.04       |
| RNF144B   | ILMN_9298   | 0.00013559  | -3.05       |
| STXBP6    | ILMN_18387  | 0.000614655 | -3.05       |
| WDR91     | ILMN_20547  | 0.000197012 | -3.07       |
| SLC16A10  | ILMN_10556  | 4.31E-05    | -3.08       |
| CPEB2     | ILMN_3402   | 0.000338478 | -3.11       |
| NUP98     | ILMN_21954  | 1.51E-06    | -3.13       |
| LOC284988 | ILMN_164134 | 0.000167525 | -3.13       |
| QDPR      | ILMN_26096  | 2.75E-05    | -3.15       |
| ATP6V1C1  | ILMN_181099 | 8.56E-05    | -3.17       |
|           | ILMN_70822  | 0.000385505 | -3.17       |
| RAB27A    | ILMN_26005  | 1.53E-05    | -3.18       |
| LOC645904 | ILMN_39266  | 2.60E-06    | -3.18       |
| FLJ46906  | ILMN_40537  | 0.00015516  | -3.22       |
| POLR3G    | ILMN_13297  | 1.82E-05    | -3.22       |
| PTP4A1    | ILMN_165831 | 2.21E-05    | -3.24       |
| STXBP1    | ILMN_10266  | 0.00011764  | -3.27       |
| GYPC      | ILMN_17566  | 2.07E-06    | -3.28       |
| KCNN2     | ILMN_165586 | 0.000389758 | -3.30       |
| TPD52     | ILMN_8812   | 1.78E-05    | -3.31       |
| GYPC      | ILMN_17566  | 3.06E-06    | -3.33       |
| LOC644590 | ILMN_45611  | 2.68E-05    | -3.33       |
| MYO5A     | ILMN_12618  | 0.000114869 | -3.35       |
| SLC22A18  | ILMN_20563  | 9.14E-05    | -3.36       |
| CPEB1     | ILMN_183191 | 1.10E-06    | -3.36       |
| STOM      | ILMN_183628 | 8.43E-05    | -3.41       |

| Symbol    | Probe ID    | p-value     | Fold-Change |
|-----------|-------------|-------------|-------------|
| DCLK1     | ILMN_178525 | 0.000737489 | -3.41       |
| C22orf25  | ILMN_13683  | 8.76E-05    | -3.43       |
| MAD1L1    | ILMN_9328   | 4.22E-08    | -3.45       |
| DSTYK     | ILMN_370437 | 0.00014763  | -3.46       |
| ASAH1     | ILMN_26236  | 7.73E-06    | -3.46       |
| C19orf28  | ILMN_11361  | 0.000170076 | -3.46       |
| LOC642956 | ILMN_42416  | 0.000303075 | -3.46       |
| CDK2      | ILMN_12332  | 2.80E-11    | -3.48       |
| HPS4      | ILMN_7734   | 3.41E-05    | -3.50       |
| SETDB2    | ILMN_24431  | 7.55E-07    | -3.52       |
| OSTM1     | ILMN_21496  | 4.18E-05    | -3.52       |
| TBC1D7    | ILMN_10292  | 1.74E-08    | -3.53       |
| TDRD7     | ILMN_27692  | 1.95E-05    | -3.54       |
| STXBP6    | ILMN_18387  | 0.000187123 | -3.54       |
| LOC388588 | ILMN_33026  | 4.85E-05    | -3.55       |
| NPL       | ILMN_25291  | 0.00018053  | -3.56       |
| PIK3CD    | ILMN_15406  | 0.00018874  | -3.59       |
| RIPK5     | ILMN_27483  | 0.000119582 | -3.61       |
| C9orf91   | ILMN_21211  | 2.95E-06    | -3.61       |
| GREB1     | ILMN_167773 | 3.93E-05    | -3.62       |
| C5orf22   | ILMN_19584  | 1.07E-06    | -3.67       |
| BCL2      | ILMN_171007 | 8.44E-06    | -3.68       |
| CDH3      | ILMN_12740  | 0.000601941 | -3.74       |
| SOX13     | ILMN_20138  | 3.11E-07    | -3.78       |
| PROS1     | ILMN_3398   | 0.000374802 | -3.82       |
| FABP5L2   | ILMN_336422 | 0.000156471 | -3.84       |
| DYNC111   | ILMN_7312   | 0.000334358 | -3.85       |
| STX7      | ILMN_23974  | 3.75E-06    | -3.88       |
| NPL       | ILMN_25291  | 5.96E-05    | -3.89       |
| PIR       | ILMN_13999  | 2.77E-05    | -3.90       |
| C10orf11  | ILMN_17394  | 2.72E-05    | -3.91       |
| GPR137B   | ILMN_10711  | 2.23E-05    | -3.92       |
| GK        | ILMN_10128  | 1.07E-05    | -3.94       |
| TMEM8     | ILMN_19628  | 8.19E-08    | -3.97       |
| SNCA      | ILMN_2235   | 1.28E-06    | -4.04       |
| SYNGR1    | ILMN_175984 | 7.29E-05    | -4.05       |

(Continued)

| Symbol     | Probe ID    | p-value     | Fold-Change |
|------------|-------------|-------------|-------------|
| C6orf192   | ILMN_166002 | 0.000362297 | -4.06       |
| INPP4B     | ILMN_22637  | 4.55E-07    | -4.07       |
| NEDD4L     | ILMN_18912  | 1.50E-07    | -4.10       |
| PRDM7      | ILMN_307242 | 0.000326591 | -4.12       |
| BIRC7      | ILMN_21032  | 2.48E-05    | -4.13       |
| KU-MEL-3   | ILMN_3790   | 0.000212321 | -4.15       |
| TBC1D16    | ILMN_17194  | 4.98E-07    | -4.16       |
| OR7E156P   | ILMN_13738  | 3.45E-05    | -4.18       |
| SLC39A6    | ILMN_170037 | 8.04E-07    | -4.18       |
|            | ILMN_84306  | 0.000224537 | -4.19       |
| SORT1      | ILMN_165748 | 6.32E-06    | -4.26       |
| PSEN2      | ILMN_21140  | 1.10E-06    | -4.30       |
| DLL3       | ILMN_21363  | 0.00041846  | -4.34       |
| GPM6B      | ILMN_23991  | 0.000574913 | -4.34       |
| SIRPA      | ILMN_166179 | 1.87E-05    | -4.36       |
| FAM174B    | ILMN_1130   | 9.87E-05    | -4.37       |
| PPM1H      | ILMN_308090 | 2.41E-05    | -4.39       |
| SLC3A2     | ILMN_178961 | 4.51E-09    | -4.39       |
| TNFRSF14   | ILMN_3329   | 2.37E-06    | -4.41       |
| HRASLS3    | ILMN_15631  | 0.000843533 | -4.44       |
| EPB41L3    | ILMN_14465  | 0.000108819 | -4.44       |
| CYFIP2     | ILMN_15047  | 0.00011641  | -4.49       |
| LZTS1      | ILMN_3351   | 0.000121107 | -4.50       |
| PIR        | ILMN_13999  | 9.22E-06    | -4.54       |
| GK         | ILMN_28282  | 2.24E-06    | -4.57       |
| CEACAM1    | ILMN_21651  | 0.000215908 | -4.57       |
| GPM6B      | ILMN_23991  | 0.000540196 | -4.65       |
| LAMA1      | ILMN_27530  | 1.66E-08    | -4.66       |
| SOX10      | ILMN_13184  | 0.000646769 | -4.68       |
| KIAA1026   | ILMN_3555   | 3.80E-08    | -4.70       |
| RUNX3      | ILMN_166428 | 6.26E-05    | -4.71       |
| RENBP      | ILMN_17151  | 0.000132876 | -4.74       |
| ST6GALNAC2 | ILMN_15305  | 0.000294835 | -4.80       |
| ACP5       | ILMN_20083  | 0.000242815 | -4.81       |
| FAM69B     | ILMN_173053 | 3.06E-05    | -4.84       |
| SLC7A8     | ILMN_22403  | 4.48E-05    | -4.92       |

| Symbol    | Probe ID    | p-value     | Fold-Change |
|-----------|-------------|-------------|-------------|
| GJB1      | ILMN_8143   | 1.43E-05    | -5.02       |
| GPR19     | ILMN_20675  | 8.22E-08    | -5.08       |
| GPR143    | ILMN_15627  | 0.000393721 | -5.18       |
| SLC45A2   | ILMN_16585  | 6.28E-06    | -5.24       |
| ZFYVE16   | ILMN_25838  | 2.43E-07    | -5.24       |
| PAR6G     | ILMN_4804   | 1.14E-09    | -5.28       |
| LONRF1    | ILMN_38387  | 2.68E-07    | -5.29       |
| PPFIBP2   | ILMN_183115 | 1.98E-06    | -5.34       |
| MICAL1    | ILMN_18994  | 3.33E-06    | -5.43       |
| SNCA      | ILMN_3516   | 3.20E-07    | -5.43       |
| MC1R      | ILMN_25536  | 9.39E-07    | -5.54       |
| LOC440459 | ILMN_183612 | 0.00017076  | -5.55       |
| SLC1A4    | ILMN_12585  | 2.08E-05    | -5.59       |
| KIT       | ILMN_306843 | 0.000332358 | -5.65       |
| TIMP2     | ILMN_166675 | 1.06E-06    | -5.66       |
| RGS12     | ILMN_161894 | 1.10E-05    | -5.71       |
| LGALS3    | ILMN_14333  | 5.94E-06    | -5.75       |
| CEACAM1   | ILMN_20142  | 9.39E-05    | -5.85       |
| CTSH      | ILMN_8602   | 3.76E-08    | -5.95       |
| FAIM3     | ILMN_28190  | 1.14E-05    | -5.96       |
| C19orf28  | ILMN_161980 | 1.20E-05    | -5.98       |
| C6orf218  | ILMN_27124  | 9.17E-09    | -6.16       |
| RRAGD     | ILMN_5663   | 1.98E-06    | -6.19       |
| SIRPA     | ILMN_1639   | 2.10E-07    | -6.25       |
| RAP1GAP   | ILMN_13405  | 2.93E-06    | -6.27       |
| MYO1D     | ILMN_22644  | 2.47E-07    | -6.47       |
| CTSH      | ILMN_8602   | 6.86E-07    | -6.61       |
| HES6      | ILMN_4854   | 5.37E-08    | -6.69       |
| CDK5R1    | ILMN_4868   | 4.34E-09    | -6.77       |
| LOC387763 | ILMN_43061  | 3.51E-05    | -6.80       |
| CABLES1   | ILMN_26976  | 2.69E-08    | -6.84       |
| EDNRB     | ILMN_22613  | 4.58E-05    | -6.93       |
| CDK2      | ILMN_12332  | 1.17E-08    | -7.01       |
| TUBB4     | ILMN_23388  | 2.31E-06    | -7.07       |
| TTYH2     | ILMN_25738  | 2.45E-07    | -7.11       |
| ST3GAL6   | ILMN_2870   | 1.09E-06    | -7.41       |

(Continued)

| Symbol    | Probe ID    | p-value     | Fold-Change |
|-----------|-------------|-------------|-------------|
| RGS1      | ILMN_177208 | 0.000198809 | -7.63       |
| BEST1     | ILMN_19773  | 8.00E-07    | -7.66       |
| ADCY1     | ILMN_179982 | 5.65E-06    | -7.69       |
| SLC16A6   | ILMN_14509  | 0.000232387 | -7.70       |
| CEACAM1   | ILMN_20142  | 8.83E-06    | -8.19       |
| ITPKB     | ILMN_12468  | 1.35E-07    | -8.31       |
| IGSF11    | ILMN_551    | 7.09E-08    | -8.39       |
| TMC6      | ILMN_19035  | 8.31E-08    | -8.44       |
| MBP       | ILMN_14913  | 8.43E-08    | -8.61       |
| QPCT      | ILMN_6510   | 1.75E-05    | -9.37       |
| CA14      | ILMN_2282   | 1.86E-06    | -9.39       |
| RAB38     | ILMN_22951  | 5.85E-06    | -9.50       |
| CHCHD6    | ILMN_19685  | 1.36E-09    | -9.51       |
| PHACTR1   | ILMN_17425  | 3.05E-07    | -9.86       |
| MITF      | ILMN_1045   | 1.09E-07    | -9.87       |
| TRIM63    | ILMN_27419  | 2.80E-09    | -10.05      |
| GDF15     | ILMN_2688   | 0.00058484  | -10.34      |
| MBP       | ILMN_10370  | 1.35E-09    | -10.43      |
| MBP       | ILMN_3041   | 2.37E-08    | -10.43      |
| DNAJA4    | ILMN_23222  | 1.21E-05    | -10.51      |
| GYG2      | ILMN_24869  | 5.62E-10    | -10.58      |
| D4S234E   | ILMN_173747 | 1.30E-06    | -11.26      |
| OCA2      | ILMN_177862 | 4.25E-06    | -11.56      |
| APOE      | ILMN_11525  | 3.41E-06    | -11.66      |
| SLC27A3   | ILMN_820    | 5.04E-06    | -11.84      |
| VGF       | ILMN_9112   | 5.85E-06    | -12.06      |
| GYG2      | ILMN_176856 | 5.12E-09    | -12.30      |
| IGFBP1    | ILMN_19001  | 2.58E-11    | -12.31      |
| DCT       | ILMN_1796   | 3.83E-05    | -12.57      |
| SEMA6A    | ILMN_11282  | 1.16E-07    | -12.60      |
| BIRC7     | ILMN_21032  | 2.10E-07    | -13.09      |
| RAB17     | ILMN_9806   | 1.68E-09    | -13.19      |
| CDH1      | ILMN_29401  | 1.07E-07    | -13.51      |
| LOC641738 | ILMN_31380  | 2.11E-08    | -14.15      |
| TSPAN10   | ILMN_12531  | 1.88E-07    | -14.39      |

| Symbol  | Probe ID   | p-value  | Fold-Change |
|---------|------------|----------|-------------|
| SLC45A2 | ILMN_29672 | 5.73E-09 | -15.52      |
| CAPN3   | ILMN_8100  | 1.11E-07 | -15.93      |
| APOLD1  | ILMN_21263 | 1.89E-10 | -16.67      |
| LAMA1   | ILMN_27530 | 1.42E-11 | -17.05      |
| CAPN3   | ILMN_25522 | 9.31E-08 | -17.61      |
| SLC45A2 | ILMN_29672 | 4.55E-10 | -22.25      |
| SLC45A2 | ILMN_29672 | 9.68E-10 | -25.05      |
| TYR     | ILMN_16044 | 5.94E-08 | -27.25      |
| MLANA   | ILMN_22830 | 2.27E-09 | -36.94      |
| SILV    | ILMN_9512  | 1.23E-10 | -75.07      |



## Supplementary Table S2.

| Mesenchymal-phenotype enrichment                    |      |           |           |
|-----------------------------------------------------|------|-----------|-----------|
| Gene Set                                            | NES  | NOM p-val | FDR q-val |
| <b>follow link to MSigDB</b>                        |      |           |           |
| CHARAFE_BREAST_CANCER_LUMINAL_VS_MESENCHYMAL_DN     | 1.87 | 0         | 0         |
| SCHUETZ_BREAST_CANCER_DUCTAL_INVASIVE_UP            | 1.87 | 0         | 0         |
| VECCHI_GASTRIC_CANCER_ADVANCED_VS_EARLY_UP          | 1.86 | 0         | 0         |
| REN_ALVEOLAR_RHABDOMYOSARCOMA_DN                    | 1.86 | 0         | 0         |
| REACTOME_EXTRACELLULAR_MATRIX_ORGANIZATION          | 1.86 | 0         | 0         |
| REACTOME_COLLAGEN_FORMATION                         | 1.85 | 0         | 0         |
| ANASTASSIOU_CANCER_MESENCHYMAL_TRANSITION_SIGNATURE | 1.83 | 0         | 0         |
| KIM_GLIS2_TARGETS_UP                                | 1.82 | 0         | 0         |
| PETROVA_ENDOTHELIUM_LYMPHATIC_VS_BLOOD_DN           | 1.82 | 0         | 0         |
| WIEDERSCHAIN_TARGETS_OF_BMI1_AND_PCGF2              | 1.81 | 0         | 0         |
| ONDER_CDH1_TARGETS_2_UP                             | 1.81 | 0         | 0         |
| GU_PDEF_TARGETS_UP                                  | 1.8  | 0         | 0         |
| KEGG_GRAFT_VERSUS_HOST_DISEASE                      | 1.79 | 0         | 0.001     |
| VART_KSHV_INFECTION_ANGIOGENIC_MARKERS_UP           | 1.78 | 0         | 0.001     |
| WANG_SMARCE1_TARGETS_UP                             | 1.78 | 0         | 0.001     |
| POTTI_TOPOTECAN_SENSITIVITY                         | 1.77 | 0         | 0.001     |
| PID_INTEGRIN3_PATHWAY                               | 1.77 | 0         | 0.001     |
| PHONG_TNF_RESPONSE_VIA_P38_PARTIAL                  | 1.77 | 0         | 0.001     |
| PID_INTEGRIN1_PATHWAY                               | 1.77 | 0.002     | 0.001     |
| PASINI_SUZ12_TARGETS_DN                             | 1.76 | 0         | 0.001     |
| AZARE_NEOPLASTIC_TRANSFORMATION_BY_STAT3_DN         | 1.75 | 0         | 0.002     |
| CHARAFE_BREAST_CANCER_LUMINAL_VS_BASAL_DN           | 1.74 | 0         | 0.002     |
| HINATA_NFKB_TARGETS_KERATINOCYTE_UP                 | 1.74 | 0.002     | 0.002     |
| GRAHAM_CML_DIVIDING_VS_NORMAL_QUIESCENT_DN          | 1.73 | 0         | 0.003     |
| GAURNIER_PSMD4_TARGETS                              | 1.73 | 0         | 0.003     |
| CROMER_TUMORIGENESIS_UP                             | 1.72 | 0         | 0.004     |
| WESTON_VEGFA_TARGETS_6HR                            | 1.72 | 0         | 0.004     |
| WILCOX_PRESPONSE_TO_ROGESTERONE_DN                  | 1.72 | 0         | 0.004     |
| PICCALUGA_ANGIOIMMUNOBLASTIC_LYMPHOMA_UP            | 1.72 | 0         | 0.004     |
| SANA_TNF_SIGNALING_UP                               | 1.71 | 0         | 0.004     |
| ZHU_CMV_24_HR_DN                                    | 1.71 | 0         | 0.004     |
| CHEN_LVAD_SUPPORT_OF_FAILING_HEART_UP               | 1.71 | 0         | 0.004     |
| PID_AVB3_INTEGRIN_PATHWAY                           | 1.71 | 0         | 0.005     |
| SWEET_KRAS_TARGETS_UP                               | 1.71 | 0         | 0.006     |

| Mesenchymal-phenotype enrichment                      |      |           |           |
|-------------------------------------------------------|------|-----------|-----------|
| Gene Set                                              | NES  | NOM p-val | FDR q-val |
| <b>follow link to MSigDB</b>                          |      |           |           |
| BOQUEST_STEM_CELL_UP                                  | 1.7  | 0         | 0.006     |
| JECHLINGER_EPITHELIAL_TO_MESENCHYMAL_TRANSITION_UP    | 1.7  | 0         | 0.006     |
| VERRECCHIA_EARLY_RESPONSE_TO_TGFB1                    | 1.7  | 0         | 0.006     |
| ZWANG_CLASS_2_TRANSIENTLY_INDUCED_BY_EGF              | 1.7  | 0         | 0.006     |
| KEGG_TYPE_I_DIABETES_MELLITUS                         | 1.69 | 0         | 0.007     |
| KEGG_ECM_RECEPTOR_INTERACTION                         | 1.69 | 0         | 0.006     |
| PHONG_TNF_RESPONSE_NOT_VIA_P38                        | 1.69 | 0         | 0.007     |
| KEGG_AUTOIMMUNE_THYROID_DISEASE                       | 1.69 | 0         | 0.007     |
| BRUECKNER_TARGETS_OF_MIRLET7A3_DN                     | 1.69 | 0         | 0.007     |
| VART_KSHV_INFECTION_ANGIOGENIC_MARKERS_DN             | 1.69 | 0         | 0.007     |
| PETROVA_PROX1_TARGETS_DN                              | 1.69 | 0         | 0.007     |
| WU_CELL_MIGRATION                                     | 1.69 | 0         | 0.007     |
| KEGG_HYPERTROPHIC_CARDIOMYOPATHY_HCM                  | 1.68 | 0         | 0.007     |
| KEGG_ASTHMA                                           | 1.68 | 0         | 0.008     |
| HUANG_DASATINIB_RESISTANCE_UP                         | 1.68 | 0         | 0.008     |
| SASAI_RESISTANCE_TO_NEOPLASTIC_TRANSFORMATION         | 1.68 | 0         | 0.008     |
| SENESE_HDAC1_AND_HDAC2_TARGETS_DN                     | 1.68 | 0         | 0.008     |
| SCHOEN_NFKB_SIGNALING                                 | 1.68 | 0         | 0.008     |
| MIYAGAWA_TARGETS_OF_EWSR1_ETS_FUSIONS_DN              | 1.68 | 0         | 0.008     |
| BASAKI_YBX1_TARGETS_UP                                | 1.67 | 0         | 0.009     |
| ZHU_CMV_ALL_DN                                        | 1.67 | 0         | 0.009     |
| REACTOME_INTERFERON_ALPHA_BETA_SIGNALING              | 1.67 | 0         | 0.009     |
| GRAESSMANN_RESPONSE_TO_MC_AND_SERUM_DEPRIVATION_UP    | 1.67 | 0         | 0.009     |
| SENESE_HDAC2_TARGETS_DN                               | 1.67 | 0         | 0.01      |
| ONDER_CDH1_TARGETS_3_DN                               | 1.66 | 0         | 0.01      |
| ALTEMEIER_RESPONSE_TO_LPS_WITH_MECHANICAL_VENTILATION | 1.66 | 0         | 0.01      |
| CROONQUIST_NRAS_VS_STROMAL_STIMULATION_DN             | 1.66 | 0         | 0.011     |
| LIM_MAMMARY_STEM_CELL_UP                              | 1.66 | 0         | 0.011     |
| DASU_IL6_SIGNALING_UP                                 | 1.66 | 0.002     | 0.011     |
| RODWELL_AGING_KIDNEY_NO_BLOOD_UP                      | 1.66 | 0         | 0.012     |
| PID_SYNDECAN_1_PATHWAY                                | 1.66 | 0         | 0.012     |
| RIGGI_EWING_SARCOMA_PROGENITOR_DN                     | 1.65 | 0         | 0.013     |
| SWEET_LUNG_CANCER_KRAS_DN                             | 1.65 | 0         | 0.014     |
| NAKAMURA_TUMOR_ZONE_PERIPHERAL_VS_CENTRAL_UP          | 1.65 | 0         | 0.014     |
| TSAI_RESPONSE_TO_RADIATION_THERAPY                    | 1.65 | 0         | 0.014     |

(Continued)

## Mesenchymal-phenotype enrichment

| Gene Set                                                | NES  | NOM p-val | FDR q-val |
|---------------------------------------------------------|------|-----------|-----------|
| <b>follow link to MSigDB</b>                            |      |           |           |
| SEITZ_NEOPLASTIC_TRANSFORMATION_BY_8P_DELETION_UP       | 1.65 | 0         | 0.014     |
| RODWELL_AGING_KIDNEY_UP                                 | 1.65 | 0         | 0.014     |
| KEGG_ALLOGRAFT_REJECTION                                | 1.65 | 0.002     | 0.014     |
| REACTOME_NCAM1_INTERACTIONS                             | 1.64 | 0         | 0.016     |
| REACTOME_INTERFERON_GAMMA_SIGNALING                     | 1.64 | 0         | 0.016     |
| BIOCARTA_INFLAM_PATHWAY                                 | 1.64 | 0         | 0.016     |
| GOTZMANN_EPITHELIAL_TO_MESENCHYMAL_TRANSITION_UP        | 1.64 | 0.002     | 0.017     |
| CLASPER_LYMPHATIC_VESSELS_DURING_METASTASIS_DN          | 1.63 | 0         | 0.019     |
| MURATA_VIRULENCE_OF_H_PILORI                            | 1.63 | 0         | 0.019     |
| CHARAFE_BREAST_CANCER_BASAL_VS_MESENCHYMAL_DN           | 1.63 | 0.002     | 0.019     |
| HECKER_IFNB1_TARGETS                                    | 1.63 | 0         | 0.019     |
| ZHANG_ANTIVIRAL_RESPONSE_TO_RIBAVIRIN_UP                | 1.63 | 0.002     | 0.019     |
| WINZEN_DEGRADED_VIA_KHSRP                               | 1.63 | 0.002     | 0.019     |
| LINDGREN_BLADDER_CANCER_CLUSTER_2B                      | 1.63 | 0         | 0.02      |
| YAO_TEMPORAL_RESPONSE_TO_PROGESTERONE_CLUSTER_16        | 1.63 | 0         | 0.02      |
| PHONG_TNF_TARGETS_UP                                    | 1.62 | 0.002     | 0.021     |
| LIU_TARGETS_OF_VMYB_VS_CMYB_DN                          | 1.62 | 0.002     | 0.02      |
| BURTON_ADIPOGENESIS_PEAK_AT_2HR                         | 1.62 | 0         | 0.02      |
| ONDER_CDH1_SIGNALING_VIA_CTNNB1                         | 1.62 | 0         | 0.022     |
| BEGUM_TARGETS_OF_PAX3_FOXO1_FUSION_DN                   | 1.62 | 0         | 0.021     |
| YAMASHITA_METHYLATED_IN_PROSTATE_CANCER                 | 1.62 | 0         | 0.021     |
| CHIBA_RESPONSE_TO_TSA_UP                                | 1.62 | 0.004     | 0.022     |
| DER_IFN_BETA_RESPONSE_UP                                | 1.62 | 0         | 0.022     |
| TURASHVILI_BREAST_LOBULAR_CARCINOMA_VS_DUCTAL_NORMAL_UP | 1.62 | 0         | 0.022     |
| GENTILE_UV_HIGH_DOSE_DN                                 | 1.62 | 0         | 0.023     |
| CROONQUIST_STROMAL_STIMULATION_UP                       | 1.61 | 0.002     | 0.024     |
| IGLESIAS_E2F_TARGETS_UP                                 | 1.61 | 0         | 0.024     |
| BILD_HRAS_ONCOGENIC_SIGNATURE                           | 1.61 | 0         | 0.023     |
| CHIARADONNA_NEOPLASTIC_TRANSFORMATION_CDC25_UP          | 1.61 | 0         | 0.024     |
| WEINMANN_ADAPTATION_TO_HYPOXIA_DN                       | 1.61 | 0.002     | 0.024     |
| DAVICIONI_TARGETS_OF_PAX_FOXO1_FUSIONS_UP               | 1.61 | 0         | 0.024     |
| ICHIBA_GRAFT_VERSUS_HOST_DISEASE_D7_UP                  | 1.61 | 0         | 0.025     |
| RICKMAN_HEAD_AND_NECK_CANCER_C                          | 1.61 | 0.002     | 0.026     |
| KEGG_FOCAL_ADHESION                                     | 1.61 | 0         | 0.026     |
| PID_API_PATHWAY                                         | 1.61 | 0.002     | 0.027     |

## Mesenchymal-phenotype enrichment

| Gene Set                                                  | NES  | NOM p-val | FDR q-val |
|-----------------------------------------------------------|------|-----------|-----------|
| <b>follow link to MSigDB</b>                              |      |           |           |
| ROZANOV_MMP14_TARGETS_UP                                  | 1.61 | 0         | 0.027     |
| BROWNE_HCMV_INFECTION_18HR_DN                             | 1.6  | 0         | 0.028     |
| WESTON_VEGFA_TARGETS_12HR                                 | 1.6  | 0.006     | 0.028     |
| WONG_ENDMETRIUM_CANCER_DN                                 | 1.6  | 0         | 0.029     |
| REACTOME_INTERFERON_SIGNALING                             | 1.6  | 0         | 0.031     |
| RUIZ_TNC_TARGETS_DN                                       | 1.6  | 0         | 0.031     |
| HINATA_NFKB_TARGETS_FIBROBLAST_UP                         | 1.6  | 0.002     | 0.031     |
| GALINDO_IMMUNE_RESPONSE_TO_ENTEROTOXIN                    | 1.6  | 0         | 0.031     |
| AMIT_EGF_RESPONSE_240_HELA                                | 1.59 | 0.004     | 0.034     |
| SMID_BREAST_CANCER_LUMINAL_A_UP                           | 1.59 | 0         | 0.034     |
| REACTOME_STRIATED_MUSCLE_CONTRACTION                      | 1.59 | 0         | 0.036     |
| BERTUCCI_MEDULLARY_VS_DUCTAL_BREAST_CANCER_DN             | 1.59 | 0         | 0.037     |
| LAIHO_COLORECTAL_CANCER_SERRATED_UP                       | 1.59 | 0         | 0.038     |
| HARRIS_BRAIN_CANCER_PROGENITORS                           | 1.58 | 0         | 0.042     |
| DAVICIONI_MOLECULAR_ARMS_VS_ERMS_DN                       | 1.58 | 0         | 0.041     |
| HUPER_BREAST_BASAL_VS_LUMINAL_DN                          | 1.58 | 0.002     | 0.041     |
| REACTOME_HS_GAG_BIOSYNTHESIS                              | 1.58 | 0.002     | 0.042     |
| SUNG_METASTASIS_STROMA_UP                                 | 1.58 | 0         | 0.043     |
| HOSHIDA_LIVER_CANCER_SUBCLASS_S1                          | 1.58 | 0         | 0.045     |
| KEGG_CYTOKINE_CYTOKINE_RECEPTOR_INTERACTION               | 1.57 | 0         | 0.045     |
| VERHAAK_GLIOMASTOMA_NEURAL                                | 1.57 | 0         | 0.045     |
| BURTON_ADIPOGENESIS_3                                     | 1.57 | 0.002     | 0.045     |
| KEEN_RESPONSE_TO_ROSIGLITAZONE_DN                         | 1.57 | 0         | 0.046     |
| KEGG_ARRHYTHMOGENIC_RIGHT_VENTRICULAR_CARDIOMYOPATHY_ARVC | 1.57 | 0.002     | 0.047     |
| TURASHVILI_BREAST_LOBULAR_CARCINOMA_VS_LOBULAR_NORMAL_DN  | 1.57 | 0.006     | 0.05      |
| KOKKINAKIS_METHIONINE_DEPRIVATION_96HR_UP                 | 1.57 | 0         | 0.05      |
| REACTOME_MUSCLE_CONTRACTION                               | 1.57 | 0.008     | 0.05      |

## Epithelial-phenotype enrichment

| Gene Set                                              | NES   | NOM p-val | FDR q-val |
|-------------------------------------------------------|-------|-----------|-----------|
| <b>follow link to MSigDB</b>                          |       |           |           |
| KEGG_OXIDATIVE_PHOSPHORYLATION                        | -1.76 | 0         | 0.011     |
| KEGG_LYSOSOME                                         | -1.7  | 0         | 0.036     |
| REACTOME_TCA_CYCLE_AND_RESPIRATORY_ELECTRON_TRANSPORT | -1.7  | 0         | 0.05      |

(Continued)

Supplementary Table S3.

| Symbol       | ProbeID     | FC:(class1/class2) | pfp    |                  |
|--------------|-------------|--------------------|--------|------------------|
| PAPSS2       | 1690259     | 4.323389537        | 0      | Hs.524491        |
| LUM          | 2490364     | 3.486750349        | 0.005  | Hs.406475        |
| IGFBP5       | 2120524     | 3.285151117        | 0.01   | Hs.635441        |
| DCN          | 7650296     | 3.272251309        | 0.0233 | Hs.156316        |
| IGFBP5       | 2190674     | 2.996703626        | 0.01   | Hs.635441        |
| HLA-B        | 5310168     | 2.973535534        | 0.0067 | Hs.77961         |
| TGFBI        | 7650358     | 2.933411558        | 0.0056 | Hs.369397        |
| PAPPA        | 730754      | 2.930832356        | 0.0067 | Hs.643599        |
| HS.552871    | 1690575     | 2.765486726        | 0.006  | <b>HS.552871</b> |
| COL5A1       | 4920369     | 2.718129927        | 0.0071 | Hs.210283        |
| EEF1A2       | 6370356     | 2.664535039        | 0.0223 | Hs.433839        |
| THBS1        | 5810685     | 2.66028199         | 0.0062 | Hs.164226        |
| MATN2        | 5810746     | 2.63227165         | 0.0164 | Hs.189445        |
| PLA2G4C      | 1990672     | 2.491280518        | 0.035  | Hs.631562        |
| HLA-DPA1     | 1190039     | 2.365744026        | 0.0427 | Hs.347270        |
| HLA-DMA      | 540563      | 2.361275089        | 0.0438 | Hs.351279        |
| HS.562219    | 5960086     | -2.0966            | 0.031  | <b>HS.562219</b> |
| SNORD15B     | 2710719     | -2.243             | 0.0469 | Hs.689080        |
| RPPH1        | 2260309     | -2.37              | 0.03   | Hs.613102        |
| HS.171009    | 3450379     | -2.3845            | 0.0471 | <b>HS.171009</b> |
| IL24         | 4290201     | -2.4175            | 0.0256 | Hs.58831         |
| UBA2         | 4290632     | -2.4322            | 0.05   | Hs.631580        |
| LOC199800    | 5960735     | -2.4582            | 0.03   | Hs.311193        |
| SNORD34      | 3780050     | -2.4926            | 0.036  |                  |
| HPDL         | 6480026     | -2.5799            | 0.0262 | Hs.162717        |
| ADRB2        | 7570326     | -2.6116            | 0.0436 | Hs.591251        |
| HS.543887    | 6840477     | -2.7403            | 0.0075 | <b>HS.543887</b> |
| CYORF15A     | 6860102     | -3.528             | 0.005  | Hs.522863        |
| EIF1AY       | 4150600     | -4.4136            | 0.01   | Hs.461178        |
| RPS4Y1       | 6100687     | -5.4352            | 0.01   | Hs.282376        |
| Probe Set ID | Gene Symbol |                    |        |                  |
| 201107_s_at  | THBS1       |                    |        |                  |
| 201108_s_at  | THBS1       |                    |        |                  |
| 201109_s_at  | THBS1       |                    |        |                  |
| 201110_s_at  | THBS1       |                    |        |                  |
| 201177_s_at  | UBA2        |                    |        |                  |

| Symbol      | ProbeID  | FC:(class1/class2) | pdf |  |
|-------------|----------|--------------------|-----|--|
| 201506_at   | TGFBI    |                    |     |  |
| 201744_s_at | LUM      |                    |     |  |
| 201893_x_at | DCN      |                    |     |  |
| 201909_at   | RPS4Y1   |                    |     |  |
| 201981_at   | PAPPA    |                    |     |  |
| 201982_s_at | PAPPA    |                    |     |  |
| 202350_s_at | MATN2    |                    |     |  |
| 203058_s_at | PAPSS2   |                    |     |  |
| 203059_s_at | PAPSS2   |                    |     |  |
| 203060_s_at | PAPSS2   |                    |     |  |
| 203325_s_at | COL5A1   |                    |     |  |
| 204409_s_at | EIF1AY   |                    |     |  |
| 204410_at   | EIF1AY   |                    |     |  |
| 204540_at   | EEF1A2   |                    |     |  |
| 206569_at   | IL24     |                    |     |  |
| 209335_at   | DCN      |                    |     |  |
| 209785_s_at | PLA2G4C  |                    |     |  |
| 211813_x_at | DCN      |                    |     |  |
| 211896_s_at | DCN      |                    |     |  |
| 211990_at   | HLA-DPA1 |                    |     |  |
| 211991_s_at | HLA-DPA1 |                    |     |  |
| 212488_at   | COL5A1   |                    |     |  |
| 212489_at   | COL5A1   |                    |     |  |
| 213537_at   | HLA-DPA1 |                    |     |  |
| 217478_s_at | HLA-DMA  |                    |     |  |
|             |          |                    |     |  |

Supplementary Table S4.

| DiI Bright Enrichment                                                                                                           |       |           |           |
|---------------------------------------------------------------------------------------------------------------------------------|-------|-----------|-----------|
| GS                                                                                                                              | NES   | NOM p-val | FDR q-val |
| <b>follow link to MSigDB</b>                                                                                                    |       |           |           |
| Genes up-regulated in mesenchymal-like melanoma cell line vs epithelial-like cell lines (Supplementary Table S1, current study) | -2.71 | 0         | 0         |
| GU_PDEF_TARGETS_UP                                                                                                              | -2.52 | 0         | 0         |
| DAUER_STAT3_TARGETS_DN                                                                                                          | -2.44 | 0         | 0         |
| SENESE_HDAC1_AND_HDAC2_TARGETS_DN                                                                                               | -2.42 | 0         | 0         |
| SENESE_HDAC2_TARGETS_DN                                                                                                         | -2.41 | 0         | 0         |
| PID_INTEGRIN1_PATHWAY                                                                                                           | -2.38 | 0         | 0         |
| SEITZ_NEOPLASTIC_TRANSFORMATION_BY_8P_DELETION_UP                                                                               | -2.35 | 0         | 0         |
| WANG_SMARCE1_TARGETS_UP                                                                                                         | -2.35 | 0         | 0         |
| BOWIE_RESPONSE_TO_TAMOXIFEN                                                                                                     | -2.34 | 0         | 0         |
| ANASTASSIOU_CANCER_MESENCHYMAL_TRANSITION_SIGNATURE                                                                             | -2.34 | 0         | 0         |
| TAKEDA_TARGETS_OF_NUP98_HOXA9_FUSION_3D_UP                                                                                      | -2.34 | 0         | 0         |
| STAMBOLSKY_TARGETS_OF_MUTATED_TP53_DN                                                                                           | -2.34 | 0         | 0         |
| SIMBULAN_PARP1_TARGETS_UP                                                                                                       | -2.33 | 0         | 0         |
| KIM_GLIS2_TARGETS_UP                                                                                                            | -2.33 | 0         | 0         |
| GRAHAM_CML QUIESCENT_VS_NORMAL QUIESCENT_DN                                                                                     | -2.31 | 0         | 0         |
| ZHU_CMV_24_HR_DN                                                                                                                | -2.3  | 0         | 0         |
| SWEET_KRAS_TARGETS_UP                                                                                                           | -2.29 | 0         | 0         |
| MOSERLE_IFNA_RESPONSE                                                                                                           | -2.28 | 0         | 0         |
| GRAHAM_CML_DIVIDING_VS_NORMAL QUIESCENT_DN                                                                                      | -2.27 | 0         | 0         |

| DiI Bright Enrichment                           |       |           |           |
|-------------------------------------------------|-------|-----------|-----------|
| GS                                              | NES   | NOM p-val | FDR q-val |
| <b>follow link to MSigDB</b>                    |       |           |           |
| TAKEDA_TARGETS_OF_NUP98_HOXA9_FUSION_8D_UP      | -2.27 | 0         | 0         |
| SCHUETZ_BREAST_CANCER_DUCTAL_INVASIVE_UP        | -2.26 | 0         | 0         |
| KIM_LRRC3B_TARGETS                              | -2.25 | 0         | 0         |
| HUANG_DASATINIB_RESISTANCE_UP                   | -2.24 | 0         | 0         |
| REN_ALVEOLAR_RHABDOMYOSARCOMA_DN                | -2.23 | 0         | 0         |
| PICCALUGA_ANGIOIMMUNOBLASTIC_LYMPHOMA_UP        | -2.23 | 0         | 0         |
| KOBAYASHI_EGFR_SIGNALING_24HR_UP                | -2.23 | 0         | 0         |
| TAKEDA_TARGETS_OF_NUP98_HOXA9_FUSION_10D_UP     | -2.21 | 0         | 0         |
| HELLEBREKERS_SILENCED_DURING_TUMOR_ANGIOGENESIS | -2.2  | 0         | 0         |
| TSAI_RESPONSE_TO_RADIATION_THERAPY              | -2.2  | 0         | 0         |
| FURUKAWA_DUSP6_TARGETS_PCI35_UP                 | -2.2  | 0         | 0         |
| BOWIE_RESPONSE_TO_EXTRACELLULAR_MATRIX          | -2.19 | 0         | 0         |
| KRASNOSELSKAYA_ILF3_TARGETS_UP                  | -2.19 | 0         | 0         |
| PETROVA_ENDOTHELIUM_LYMPHATIC_VS_BLOOD_DN       | -2.19 | 0         | 0         |
| ROZANOV_MMP14_TARGETS_UP                        | -2.18 | 0         | 0         |
| CHICAS_RBI_TARGETS_CONFLUENT                    | -2.18 | 0         | 0         |
| FARMER_BREAST_CANCER_CLUSTER_1                  | -2.16 | 0         | 0         |
| AZARE NEOPLASTIC_TRANSFORMATION_BY_STAT3_DN     | -2.15 | 0         | 0         |

(Continued)



| DiI Bright Enrichment                         |       |           |           |
|-----------------------------------------------|-------|-----------|-----------|
| GS                                            | NES   | NOM p-val | FDR q-val |
| <b>follow link to MSigDB</b>                  |       |           |           |
| XU_AKT1_TARGETS_6HR                           | -2.15 | 0         | 0         |
| CUI_TCF21_TARGETS_UP                          | -2.14 | 0         | 0         |
| KEGG_TYPE_I_DIABETES_MELLITUS                 | -2.12 | 0         | 0.001     |
| WU_CELL_MIGRATION                             | -2.11 | 0         | 0.001     |
| ZHU_CMV_ALL_DN                                | -2.11 | 0         | 0.001     |
| NAKAYAMA_SOFT_TISSUE_TUMORS_PCA1_UP           | -2.11 | 0         | 0.001     |
| LIANG_SILENCED_BY_METHYLATION_2               | -2.11 | 0         | 0.001     |
| RODWELL_AGING_KIDNEY_NO_BLOOD_UP              | -2.1  | 0         | 0.001     |
| LIU_PROSTATE_CANCER_DN                        | -2.09 | 0         | 0.001     |
| LANDIS_BREAST_CANCER_PROGRESSION_DN           | -2.09 | 0         | 0.001     |
| RADAEVA_RESPONSE_TO_IFNA1_UP                  | -2.09 | 0         | 0.001     |
| COLIN_PILOCYTIC_ASTROCYTOMA_VS_GLIOMASTOMA_UP | -2.08 | 0         | 0.001     |
| COWLING_MYCN_TARGETS                          | -2.08 | 0         | 0.001     |
| ROY_WOUND_BLOOD_VESSEL_UP                     | -2.08 | 0         | 0.001     |
| HECKER_IFNB1_TARGETS                          | -2.07 | 0         | 0.001     |
| RUIZ_TNC_TARGETS_UP                           | -2.07 | 0         | 0.001     |
| SANA_TNF_SIGNALING_DN                         | -2.07 | 0         | 0.001     |
| MAHADEVAN_IMATINIB_RESISTANCE_UP              | -2.06 | 0         | 0.001     |
| LIANG_SILENCED_BY_METHYLATION_UP              | -2.05 | 0         | 0.002     |
| KANG_GIST_WITH_PDGFR_A_UP                     | -2.05 | 0         | 0.001     |
| MISSIAGLIA_REGULATED_BY_METHYLATION_UP        | -2.05 | 0         | 0.001     |
| MIYAGAWA_TARGETS_OF_EWSR1_ETS_FUSIONS_DN      | -2.04 | 0         | 0.002     |
| CROMER_TUMORIGENESIS_UP                       | -2.04 | 0         | 0.002     |

| DiI Bright Enrichment                 |       |           |           |
|---------------------------------------|-------|-----------|-----------|
| GS                                    | NES   | NOM p-val | FDR q-val |
| <b>follow link to MSigDB</b>          |       |           |           |
| BROWNE_HCMV_INFECTION_24HR_DN         | -2.04 | 0         | 0.002     |
| JOHNSTONE_PARVB_TARGETS_2_UP          | -2.04 | 0         | 0.002     |
| KEGG_ALLOGRAFT_REJECTION              | -2.04 | 0         | 0.002     |
| SANA_RESPONSE_TO_IFNG_UP              | -2.03 | 0         | 0.002     |
| BOQUEST_STEM_CELL_UP                  | -2.03 | 0         | 0.002     |
| WONG_ENDMETRIUM_CANCER_DN             | -2.03 | 0         | 0.002     |
| KARLSSON_TGFB1_TARGETS_DN             | -2.03 | 0         | 0.002     |
| KEGG_GRAFT_VERSUS_HOST_DISEASE        | -2.02 | 0         | 0.002     |
| SUNG_METASTASIS_STROMA_UP             | -2.02 | 0         | 0.002     |
| FRIDMAN_IMMORTALIZATION_DN            | -2.02 | 0         | 0.002     |
| KANNAN_TP53_TARGETS_UP                | -2.01 | 0         | 0.002     |
| MANALO_HYPOXIA_UP                     | -2.01 | 0         | 0.002     |
| KAAB_HEART_ATRIUM_VS_VENTRICLE_UP     | -2.01 | 0         | 0.003     |
| WARTERS_RESPONSE_TO_IR_SKIN           | -2.01 | 0         | 0.003     |
| ZHANG_INTERFERON_RESPONSE             | -2.01 | 0         | 0.003     |
| LAIHO_COLORECTAL_CANCER_SERRATED_UP   | -2    | 0         | 0.003     |
| SENESE_HDAC1_TARGETS_DN               | -2    | 0         | 0.003     |
| HENDRICKS_SMARCA4_TARGETS_UP          | -2    | 0         | 0.003     |
| BENNETT_SYSTEMIC_LUPUS_ERYTHEMATOSUS  | -1.99 | 0         | 0.003     |
| LINDSTEDT_DENDRITIC_CELL_MATURATION_D | -1.99 | 0.002     | 0.003     |
| KEGG_CELL_ADHESION_MOLECULES_CAMS     | -1.99 | 0         | 0.003     |
| GILDEA_METASTASIS                     | -1.99 | 0         | 0.003     |

(Continued)

| DiI Bright Enrichment                    |       |           |           |
|------------------------------------------|-------|-----------|-----------|
| GS                                       | NES   | NOM p-val | FDR q-val |
| <b>follow link to MSigDB</b>             |       |           |           |
| MCCLUNG_DELTA_FOSB_TARGETS_2WK           | -1.99 | 0         | 0.003     |
| PID_SYNDECAN_1_PATHWAY                   | -1.99 | 0         | 0.003     |
| WIELAND_UP_BY_HBV_INFECTION              | -1.98 | 0         | 0.003     |
| THUM_MIR21_TARGETS_HEART_DISEASE_UP      | -1.98 | 0         | 0.003     |
| BECKER_TAMOXIFEN_RESISTANCE_UP           | -1.98 | 0         | 0.003     |
| GAUSSMANN_MLL_AF4_FUSION_TARGETS_F_UP    | -1.98 | 0         | 0.003     |
| ZHAN_MULTIPLE_MYELOMA_LB_DN              | -1.97 | 0         | 0.003     |
| UROSEVIC_RESPONSE_TO_IMIQUMOD            | -1.97 | 0         | 0.003     |
| DER_IFN_ALPHA_RESPONSE_UP                | -1.97 | 0         | 0.004     |
| KINSEY_TARGETS_OF_EWSR1_FLII_FUSION_DN   | -1.97 | 0         | 0.004     |
| CROONQUIST_IL6_DEPRIVATION_UP            | -1.96 | 0         | 0.004     |
| DANG_REGULATED_BY_MYC_DN                 | -1.96 | 0         | 0.004     |
| ZIRN_TRETINOIN_RESPONSE_UP               | -1.95 | 0         | 0.004     |
| REACTOME_INTERFERON_ALPHA_BETA_SIGNALING | -1.95 | 0         | 0.004     |
| HARRIS_BRAIN_CANCER_PROGENITORS          | -1.95 | 0.002     | 0.004     |
| GUENTHER_GROWTH_SPHERICAL_VS_ADHERENT_DN | -1.95 | 0         | 0.004     |
| LIM_MAMMARY_STEM_CELL_UP                 | -1.95 | 0         | 0.004     |
| REACTOME_NCAM1_INTERACTIONS              | -1.95 | 0.002     | 0.004     |
| EINAV_INTERFERON_SIGNATURE_IN_CANCER     | -1.95 | 0         | 0.004     |
| VANTVEER_BREAST_CANCER_METASTASIS_UP     | -1.95 | 0         | 0.004     |
| DASU_IL6_SIGNALING_SCAR_DN               | -1.95 | 0         | 0.004     |

| DiI Bright Enrichment                                    |       |           |           |
|----------------------------------------------------------|-------|-----------|-----------|
| GS                                                       | NES   | NOM p-val | FDR q-val |
| <b>follow link to MSigDB</b>                             |       |           |           |
| BROWNE_INTERFERON_RESPONSIVE_GENES                       | -1.94 | 0         | 0.004     |
| JI_CARCIANOGENESIS_BY_KRAS_AND_STK11_DN                  | -1.94 | 0.002     | 0.004     |
| KEGG_VIRAL_MYOCARDITIS                                   | -1.94 | 0         | 0.005     |
| TURASHVILI_BREAST_LOBULAR_CARCIANOMA_VS_DUCTAL_NORMAL_UP | -1.94 | 0         | 0.004     |
| HELLER_SILENCED_BY_METHYLATION_UP                        | -1.94 | 0         | 0.004     |
| PETRETTO_CARDIAC_HYPERTROPHY                             | -1.93 | 0         | 0.005     |
| KORKOLA_YOLK_SAC_TUMOR                                   | -1.93 | 0         | 0.005     |
| POTTI_TOPOTECAN_SENSITIVITY                              | -1.93 | 0         | 0.005     |
| NIELSEN_SYNOVIAL_SARCOMA_DN                              | -1.93 | 0         | 0.005     |
| POOLA_INVASIVE_BREAST_CANCER_DN                          | -1.92 | 0         | 0.005     |
| PETROVA_PROX1_TARGETS_DN                                 | -1.92 | 0         | 0.005     |
| DASU_IL6_SIGNALING_UP                                    | -1.92 | 0         | 0.005     |
| ISSAEVA_MLL2_TARGETS                                     | -1.92 | 0         | 0.005     |
| WOTTON_RUNX_TARGETS_UP                                   | -1.92 | 0.004     | 0.005     |
| SUZUKI_RESPONSE_TO_TSA_AND_DECITABINE_1A                 | -1.91 | 0.002     | 0.006     |
| CERVERA_SDHB_TARGETS_2                                   | -1.91 | 0         | 0.006     |
| CLASPER_LYMPHATIC_VESSELS_DURING_METASTASIS_UP           | -1.91 | 0.002     | 0.006     |
| XU_HGF_TARGETS_INDUCED_BY_AKT1_6HR                       | -1.91 | 0.004     | 0.006     |
| REACTOME_INTEGRIN_CELL_SURFACE_INTERACTIONS              | -1.9  | 0         | 0.006     |
| KOYAMA_SEMA3B_TARGETS_UP                                 | -1.9  | 0         | 0.006     |

(Continued)

| DiI Bright Enrichment                                    |       |           |           |
|----------------------------------------------------------|-------|-----------|-----------|
| GS                                                       | NES   | NOM p-val | FDR q-val |
| <b>follow link to MSigDB</b>                             |       |           |           |
| BERENJENO_TRANSFORMED_BY_RHOA_DN                         | -1.9  | 0         | 0.006     |
| GRANDVAUX_IRF3_TARGETS_UP                                | -1.9  | 0         | 0.007     |
| AMUNDSON_GAMMA_RADIATION_RESISTANCE                      | -1.89 | 0         | 0.008     |
| CORRE_MULTIPLE_MYELOMA_UP                                | -1.89 | 0         | 0.008     |
| TURASHVILI_BREAST_LOBULAR_CARCINOMA_VS_LOBULAR_NORMAL_DN | -1.89 | 0         | 0.008     |
| KANG_CISPLATIN_RESISTANCE_UP                             | -1.88 | 0.002     | 0.008     |
| GARCIA_TARGETS_OF_FLI1_AND_DAX1_UP                       | -1.88 | 0.002     | 0.008     |
| VERHAAK_AML_WITH_NPM1_MUTATED_DN                         | -1.88 | 0         | 0.008     |
| KEGG_AUTOIMMUNE_THYROID_DISEASE                          | -1.88 | 0         | 0.009     |
| LEE_NEURAL_CREAST_STEM_CELL_UP                           | -1.88 | 0         | 0.009     |
| IGLESIAS_E2F_TARGETS_UP                                  | -1.88 | 0         | 0.009     |
| MCCABE_HOXC6_TARGETS_DN                                  | -1.87 | 0         | 0.009     |
| SMID_BREAST_CANCER_RELAPSE_IN_BRAIN_DN                   | -1.87 | 0         | 0.009     |
| GAURNIER_PSMD4_TARGETS                                   | -1.87 | 0         | 0.009     |
| PID_AVB3_INTEGRIN_PATHWAY                                | -1.86 | 0         | 0.01      |
| RIGGI_EWING_SARCOMA_PROGENITOR_DN                        | -1.86 | 0         | 0.01      |
| REACTOME_COLLAGEN_FORMATION                              | -1.86 | 0         | 0.01      |
| REACTOME_HDL_MEDIATED_LIPID_TRANSPORT                    | -1.86 | 0.002     | 0.01      |
| IZADPANAH_STEM_CELL_ADIPOSE_VS_BONE_DN                   | -1.86 | 0         | 0.01      |
| RODWELL_AGING_KIDNEY_UP                                  | -1.86 | 0         | 0.01      |

| DiI Bright Enrichment                             |       |           |           |
|---------------------------------------------------|-------|-----------|-----------|
| GS                                                | NES   | NOM p-val | FDR q-val |
| <b>follow link to MSigDB</b>                      |       |           |           |
| VALK_AML_CLUSTER_11                               | -1.86 | 0.002     | 0.01      |
| HUANG_FOXA2_TARGETS_DN                            | -1.85 | 0         | 0.011     |
| REACTOME_EXTRACELLULAR_MATRIX_ORGANIZATION        | -1.85 | 0         | 0.011     |
| KONDO_EZH2_TARGETS                                | -1.85 | 0         | 0.011     |
| TRAYNOR_RETT_SYNDROM_UP                           | -1.85 | 0.004     | 0.011     |
| LINDGREN_BLADDER_CANCER_CLUSTER_2B                | -1.85 | 0         | 0.011     |
| ACEVEDO_FGFR1_TARGETS_IN_PROSTATE_CANCER_MODEL_DN | -1.85 | 0         | 0.012     |
| YANG_BCL3_TARGETS_UP                              | -1.84 | 0         | 0.012     |
| ZHANG_GATA6_TARGETS_DN                            | -1.84 | 0         | 0.012     |
| KEGG_ECM_RECEPTOR_INTERACTION                     | -1.84 | 0         | 0.012     |
| VART_KSHV_INFECTION_ANGIOGENIC_MARKERS_UP         | -1.84 | 0         | 0.012     |
| DUNNE_TARGETS_OF_AML1_MTG8_FUSION_DN              | -1.84 | 0.002     | 0.012     |
| CHANG_IMMORTALIZED_BY_HP31_DN                     | -1.84 | 0         | 0.013     |
| FRIDMAN_SENESCENCE_UP                             | -1.84 | 0         | 0.012     |
| WESTON_VEGFA_TARGETS_12HR                         | -1.84 | 0.002     | 0.013     |
| KERLEY_RESPONSE_TO_CISPLATIN_UP                   | -1.83 | 0         | 0.013     |
| REACTOME_PYRIMIDINE_METABOLISM                    | -1.83 | 0         | 0.013     |
| ICHIBA_GRAFT_VERSUS_HOST_DISEASE_D7_UP            | -1.83 | 0         | 0.013     |
| PHESSSE_TARGETS_OF_APC_AND_MBD2_UP                | -1.83 | 0.002     | 0.013     |
| BAELDE_DIABETIC_NEPHROPATHY_DN                    | -1.83 | 0         | 0.014     |
| VANASSE_BCL2_TARGETS_UP                           | -1.82 | 0.002     | 0.014     |

(Continued)

| DiI Bright Enrichment                              |       |           |           |
|----------------------------------------------------|-------|-----------|-----------|
| GS                                                 | NES   | NOM p-val | FDR q-val |
| <b>follow link to MSigDB</b>                       |       |           |           |
| PID_INTEGRIN3_PATHWAY                              | -1.82 | 0         | 0.015     |
| FUJII_YBX1_TARGETS_UP                              | -1.82 | 0         | 0.015     |
| ROSS_AML_WITH_PML_RARA_FUSION                      | -1.82 | 0         | 0.015     |
| TUOMISTO_TUMOR_SUPPRESSION_BY_COL13A1_UP           | -1.81 | 0.002     | 0.016     |
| DELYS_THYROID_CANCER_UP                            | -1.81 | 0         | 0.016     |
| JECHLINGER_EPITHELIAL_TO_MESENCHYMAL_TRANSITION_UP | -1.81 | 0         | 0.016     |
| BRUECKNER_TARGETS_OF_MIRLET7A3_DN                  | -1.81 | 0         | 0.017     |
| CHIARADONNA_NEOPLASTIC_TRANSFORMATION_KRAS_DN      | -1.81 | 0         | 0.017     |
| CASTELLANO_NRAS_TARGETS_UP                         | -1.81 | 0         | 0.017     |
| HAN_SATB1_TARGETS_UP                               | -1.81 | 0         | 0.017     |
| LEIN_CHOROID_PLEXUS_MARKERS                        | -1.81 | 0         | 0.017     |
| ONDER_CDH1_TARGETS_2_UP                            | -1.8  | 0         | 0.017     |
| SASAI_RESISTANCE_TO_NEOPLASTIC_TRANSFORMATION      | -1.8  | 0.002     | 0.017     |
| NEWMAN_ERCC6_TARGETS_DN                            | -1.8  | 0.002     | 0.017     |
| TSUNODA_CISPLATIN_RESISTANCE_DN                    | -1.8  | 0         | 0.017     |
| LU_AGING_BRAIN_UP                                  | -1.8  | 0         | 0.017     |
| BERTUCCI_MEDULLARY_VS_DUCTAL_BREAST_CANCER_DN      | -1.8  | 0         | 0.018     |
| ZHANG_ANTIVIRAL_RESPONSE_TO_RIBAVIRIN_UP           | -1.8  | 0.004     | 0.018     |
| FRASOR_RESPONSE_TO ESTRADIOL_DN                    | -1.8  | 0         | 0.018     |
| NIELSEN_SCHWANNOMA_UP                              | -1.8  | 0         | 0.018     |

| DiI Bright Enrichment                               |       |           |           |
|-----------------------------------------------------|-------|-----------|-----------|
| GS                                                  | NES   | NOM p-val | FDR q-val |
| <b>follow link to MSigDB</b>                        |       |           |           |
| BURTON_ADIPOGENESIS_7                               | -1.8  | 0         | 0.018     |
| ZHANG_TLX_TARGETS_DN                                | -1.79 | 0         | 0.018     |
| DUTERTRE ESTRADIOL_RESPONSE_24HR_DN                 | -1.79 | 0         | 0.018     |
| DIRMEIER_LMP1_RESPONSE_LATE_DN                      | -1.79 | 0.002     | 0.018     |
| MCLACHLAN_DENTAL_CARIES_UP                          | -1.79 | 0         | 0.019     |
| MIKKELSEN_MEF_LCP_WITH_H3K4ME3                      | -1.79 | 0         | 0.019     |
| DER_IFN_BETA_RESPONSE_UP                            | -1.79 | 0         | 0.018     |
| DEMAGALHAES_AGING_UP                                | -1.79 | 0         | 0.019     |
| GRADE_COLON_AND_RECTAL_CANCER_DN                    | -1.79 | 0         | 0.019     |
| HELLER_HDAC_TARGETS_SILENCED_BY_METHYLATION_UP      | -1.79 | 0         | 0.019     |
| LOPEZ_MESOTHELIOMA_SURVIVAL_OVERALL_DN              | -1.79 | 0.002     | 0.019     |
| JOHNSTONE_PARVB_TARGETS_3_UP                        | -1.79 | 0         | 0.019     |
| ONDER_CDH1_TARGETS_1_UP                             | -1.79 | 0         | 0.019     |
| PEDERSEN_METASTASIS_BY_ERBB2_ISOFORM_4              | -1.79 | 0         | 0.019     |
| LEE_LIVER_CANCER_DENA_UP                            | -1.78 | 0.002     | 0.019     |
| BOQUEST_STEM_CELL_CULTURED_VS_FRESH_UP              | -1.78 | 0         | 0.019     |
| HOELZEL_NF1_TARGETS_UP                              | -1.78 | 0         | 0.02      |
| SENGUPTA_NASOPHARYNGEAL_CARCINOMA_WITH_LMP1_DN      | -1.78 | 0         | 0.02      |
| WINZEN_DEGRADED_VIA_KHSRP                           | -1.78 | 0         | 0.02      |
| SATO_SILENCED_BY_METHYLATION_IN_PANCREATIC_CANCER_1 | -1.78 | 0         | 0.02      |

(Continued)



| DiI Bright Enrichment                                   |       |           |           |
|---------------------------------------------------------|-------|-----------|-----------|
| GS                                                      | NES   | NOM p-val | FDR q-val |
| <b>follow link to MSigDB</b>                            |       |           |           |
| ELVIDGE_HIF1A_AND_HIF2A_TARGETS_DN                      | -1.78 | 0         | 0.02      |
| FARMER_BREAST_CANCER_CLUSTER_5                          | -1.78 | 0.006     | 0.02      |
| WAMUNYOKOLI_OVARIAN_CANCER_LMP_DN                       | -1.77 | 0         | 0.021     |
| CHANG_CORE_SERUM_RESPONSE_DN                            | -1.77 | 0         | 0.021     |
| TAKEDA_TARGETS_OF_NUP98_HOXA9_FUSION_16D_UP             | -1.77 | 0         | 0.021     |
| CERVERA_SDHB_TARGETS_1_UP                               | -1.77 | 0         | 0.022     |
| SANA_TNF_SIGNALING_UP                                   | -1.77 | 0.002     | 0.022     |
| PLASARI_TGFB1_TARGETS_10HR_DN                           | -1.77 | 0         | 0.022     |
| KEGG_GLYCOSAMINOGLYCAN_BIOSYNTHESIS_CHONDROITIN_SULFATE | -1.77 | 0.002     | 0.022     |
| PEREZ_TP63_TARGETS                                      | -1.77 | 0         | 0.022     |
| TONKS_TARGETS_OF_RUNX1_RUNX1T1_FUSION_HSC_UP            | -1.77 | 0         | 0.022     |
| CHANDRAN_METASTASIS_DN                                  | -1.77 | 0         | 0.022     |
| VERRECCHIA_EARLY_RESPONSE_TO_TGFB1                      | -1.77 | 0         | 0.022     |
| ROZANOV_MMP14_TARGETS_SUBSET                            | -1.76 | 0.004     | 0.022     |
| SHARMA_PILOCYTIC_ASTROCYTOMA_LOCATION_UP                | -1.76 | 0.004     | 0.022     |
| EBAUER_TARGETS_OF_PAX3_FOXO1_FUSION_UP                  | -1.76 | 0         | 0.022     |
| SMID_BREAST_CANCER_LUMINAL_B_UP                         | -1.76 | 0         | 0.022     |
| LI_WILMS_TUMOR_VS_FETAL_KIDNEY_1_UP                     | -1.76 | 0         | 0.022     |
| RIGGINS_TAMOXIFEN_RESISTANCE_DN                         | -1.76 | 0         | 0.023     |

| DiI Bright Enrichment                            |       |           |           |
|--------------------------------------------------|-------|-----------|-----------|
| GS                                               | NES   | NOM p-val | FDR q-val |
| <b>follow link to MSigDB</b>                     |       |           |           |
| ZEMBUTSU_SENSITIVITY_TO_VINBLASTINE              | -1.76 | 0         | 0.023     |
| DUNNE_TARGETS_OF_AML1_MTG8_FUSION_UP             | -1.76 | 0         | 0.023     |
| PEREZ_TP53_AND_TP63_TARGETS                      | -1.75 | 0         | 0.024     |
| KOKKINAKIS_METHIONINE_DEPRIVATION_96HR_UP        | -1.75 | 0         | 0.024     |
| ZHAN_V1_LATE_DIFFERENTIATION_GENES_UP            | -1.75 | 0.004     | 0.024     |
| PASINI_SUZ12_TARGETS_DN                          | -1.75 | 0         | 0.024     |
| KEGG_ASTHMA                                      | -1.75 | 0.004     | 0.024     |
| ICHIBA_GRAFT_VERSUS_HOST_DISEASE_35D_UP          | -1.75 | 0         | 0.025     |
| BOYVAULT_LIVER_CANCER_SUBCLASS_G5_DN             | -1.75 | 0.004     | 0.025     |
| KIM_WT1_TARGETS_12HR_UP                          | -1.75 | 0         | 0.025     |
| LIU_SMARCA4_TARGETS                              | -1.75 | 0.002     | 0.025     |
| REACTOME_INTERFERON_SIGNALING                    | -1.75 | 0         | 0.026     |
| PAPASPYRIDONOS_UNSTABLE_ATEROSCLEROTIC_PLAQUE_DN | -1.74 | 0.002     | 0.026     |
| CHIANG_LIVER_CANCER_SUBCLASS_INTERFERON_UP       | -1.74 | 0.009     | 0.026     |
| LABBE_TGFB1_TARGETS_UP                           | -1.74 | 0         | 0.026     |
| URS_ADIPOCYTE_DIFFERENTIATION_DN                 | -1.74 | 0.005     | 0.026     |
| MCLACHLAN_DENTAL_CARIES_DN                       | -1.74 | 0         | 0.026     |
| YAO_TEMPORAL_RESPONSE_TO_PROGESTERONE_CLUSTER_16 | -1.74 | 0.003     | 0.028     |

(Continued)

| <b>DiI Bright Enrichment</b>                          |            |                  |                  |
|-------------------------------------------------------|------------|------------------|------------------|
| <b>GS</b>                                             | <b>NES</b> | <b>NOM p-val</b> | <b>FDR q-val</b> |
| <b>follow link to MSigDB</b>                          |            |                  |                  |
| DOANE_BREAST_CANCER_ESR1_UP                           | -1.74      | 0.002            | 0.028            |
| VALK_AML_WITH_EV11                                    | -1.74      | 0.009            | 0.027            |
| LEIN_NEURON_MARKERS                                   | -1.73      | 0.002            | 0.028            |
| HELLER_HDAC_TARGETS_UP                                | -1.73      | 0                | 0.028            |
| VALK_AML_WITH_FLT3_ITD                                | -1.73      | 0.002            | 0.028            |
| CHEMNITZ_RESPONSE_TO_PROSTAGLANDIN_E2_DN              | -1.73      | 0                | 0.029            |
| KEGG_REGULATION_OF_ACTIN_CYTOSKELETON                 | -1.73      | 0                | 0.029            |
| REACTOME_NEGATIVE_REGULATORS_OF_RIG_I_MDA5_SIGNALING  | -1.73      | 0                | 0.029            |
| SERVITJA_ISLET_HNF1A_TARGETS_UP                       | -1.73      | 0                | 0.029            |
| MARKEY_RB1_ACUTE_LOF_UP                               | -1.72      | 0                | 0.03             |
| TONKS_TARGETS_OF_RUNX1_RUNX1T1_FUSION_ERYTHROCYTE_UP  | -1.72      | 0                | 0.03             |
| CHARAFE_BREAST_CANCER_LUMINAL_VS_BASAL_DN             | -1.72      | 0                | 0.03             |
| CHARAFE_BREAST_CANCER_LUMINAL_VS_MESENCHYMAL_DN       | -1.72      | 0                | 0.03             |
| ELVIDGE_HYPOXIA_UP                                    | -1.72      | 0                | 0.03             |
| IVANOVA_HEMATOPOIESIS_STEM_CELL_LONG_TERM             | -1.72      | 0                | 0.03             |
| GRUETZMANN_PANCREATIC_CANCER_UP                       | -1.72      | 0                | 0.03             |
| SMID_BREAST_CANCER_LUMINAL_B_DN                       | -1.72      | 0                | 0.03             |
| HIRSCH_CELLULAR_TRANSFORMATION_SIGNATURE_DN           | -1.72      | 0                | 0.03             |
| GARGALOVIC_RESPONSE_TO_OXIDIZED_PHOSPHOLIPIDS_GREY_DN | -1.72      | 0.002            | 0.03             |

| DiI Bright Enrichment                                     |       |           |           |
|-----------------------------------------------------------|-------|-----------|-----------|
| GS                                                        | NES   | NOM p-val | FDR q-val |
| <b>follow link to MSigDB</b>                              |       |           |           |
| HEIDENBLAD_AMPLICON_8Q24_DN                               | -1.72 | 0.002     | 0.031     |
| REACTOME_GLYCOSAMINOGLYCAN_METABOLISM                     | -1.72 | 0.002     | 0.031     |
| LIEN_BREAST_CARCINOMA_METAPLASTIC                         | -1.72 | 0.002     | 0.031     |
| NADERI_BREAST_CANCER_PROGNOSIS_DN                         | -1.72 | 0.006     | 0.031     |
| ELVIDGE_HIF1A_TARGETS_DN                                  | -1.71 | 0.002     | 0.031     |
| REACTOME_COMPLEMENT_CASCADE                               | -1.71 | 0.007     | 0.031     |
| REACTOME_SIGNALING_BY_PDGF                                | -1.71 | 0.002     | 0.032     |
| HORIUCHI_WTAP_TARGETS_UP                                  | -1.71 | 0         | 0.032     |
| YAO_HOXA10_TARGETS_VIA_PROGESTERONE_DN                    | -1.71 | 0.004     | 0.033     |
| BROWNE_HCMV_INFECTION_4HR_UP                              | -1.71 | 0.002     | 0.033     |
| DER_IFN_GAMMA_RESPONSE_UP                                 | -1.71 | 0         | 0.033     |
| ALONSO_METASTASIS_EMT_UP                                  | -1.71 | 0.005     | 0.033     |
| SAMOLS_TARGETS_OF_KHSV_MIRNAS_DN                          | -1.71 | 0.002     | 0.033     |
| MASRI_RESISTANCE_TO_TAMOXIFEN_AND_AROMATASE_INHIBITORS_DN | -1.7  | 0.025     | 0.034     |
| DURAND_STROMA_MAX_UP                                      | -1.7  | 0         | 0.034     |
| LANDIS_ERBB2_BREAST_TUMORS_324_DN                         | -1.7  | 0.002     | 0.034     |
| CAIRO_LIVER_DEVELOPMENT_DN                                | -1.7  | 0         | 0.034     |
| WESTON_VEGFA_TARGETS_6HR                                  | -1.7  | 0.005     | 0.034     |
| REACTOME_INTERFERON_GAMMA_SIGNALING                       | -1.7  | 0         | 0.034     |

(Continued)

| DiI Bright Enrichment                                |       |           |           |
|------------------------------------------------------|-------|-----------|-----------|
| GS                                                   | NES   | NOM p-val | FDR q-val |
| <b>follow link to MSigDB</b>                         |       |           |           |
| CROONQUIST_STROMAL_STIMULATION_UP                    | -1.7  | 0.004     | 0.035     |
| BOQUEST_STEM_CELL_DN                                 | -1.7  | 0         | 0.035     |
| BIOCARTA_RHO_PATHWAY                                 | -1.69 | 0.009     | 0.036     |
| VALK_AML_CLUSTER_10                                  | -1.69 | 0.009     | 0.037     |
| YAO_TEMPORAL_RESPONSE_TO_PROGESTERONE_CLUSTER_15     | -1.69 | 0.005     | 0.037     |
| VALK_AML_CLUSTER_4                                   | -1.69 | 0.005     | 0.037     |
| HANN_RESISTANCE_TO_BCL2_INHIBITOR_UP                 | -1.69 | 0.007     | 0.037     |
| SCHAEFFER_PROSTATE_DEVELOPMENT_48HR_DN               | -1.69 | 0         | 0.038     |
| HAN_SATB1_TARGETS_DN                                 | -1.69 | 0         | 0.038     |
| GAUSSMANN_MLL_AF4_FUSION_TARGETS_E_UP                | -1.69 | 0.002     | 0.038     |
| VALK_AML_CLUSTER_13                                  | -1.69 | 0.006     | 0.038     |
| VALK_AML_CLUSTER_12                                  | -1.69 | 0.004     | 0.038     |
| VECCHI_GASTRIC_CANCER_EARLY_DN                       | -1.69 | 0         | 0.038     |
| PID_INTEGRIN_CS_PATHWAY                              | -1.69 | 0.013     | 0.038     |
| HOSHIDA_LIVER_CANCER_SUBCLASS_S1                     | -1.68 | 0         | 0.038     |
| VECCHI_GASTRIC_CANCER_ADVANCED_VS_EARLY_UP           | -1.68 | 0.002     | 0.038     |
| WELCSH_BRCA1_TARGETS_UP                              | -1.68 | 0         | 0.04      |
| VERHAAK_GLIOMASTOMA_NEURAL                           | -1.68 | 0         | 0.04      |
| ZHANG_TLX_TARGETS_60HR_UP                            | -1.68 | 0         | 0.041     |
| THUM_SYSTOLIC_HEART_FAILURE_UP                       | -1.68 | 0         | 0.041     |
| RICKMAN_TUMOR_DIFFERENTIATED_MODERATELY_VS_POORLY_UP | -1.67 | 0.002     | 0.041     |

| DiI Bright Enrichment                             |       |           |           |
|---------------------------------------------------|-------|-----------|-----------|
| GS                                                | NES   | NOM p-val | FDR q-val |
| <b>follow link to MSigDB</b>                      |       |           |           |
| GREENBAUM_E2A_TARGETS_DN                          | -1.67 | 0.013     | 0.041     |
| KEGG_INTESTINAL_IMMUNE_NETWORK_FOR_IGA_PRODUCTION | -1.67 | 0.002     | 0.041     |
| ELVIDGE_HYPOXIA_BY_DMOG_UP                        | -1.67 | 0.002     | 0.041     |
| KEGG_FOCAL_ADHESION                               | -1.67 | 0         | 0.041     |
| CHEBOTAEV_GR_TARGETS_DN                           | -1.67 | 0         | 0.042     |
| YAMASHITA_METHYLATED_IN_PROSTATE_CANCER           | -1.67 | 0.004     | 0.042     |
| NAKAMURA_ADIPOGENESIS_LATE_DN                     | -1.67 | 0.002     | 0.042     |
| HUPER_BREAST_BASAL_VS_LUMINAL_DN                  | -1.67 | 0.003     | 0.044     |
| ACEVEDO_LIVER_CANCER_WITH_H3K27ME3_UP             | -1.66 | 0         | 0.044     |
| SMID_BREAST_CANCER_NORMAL_LIKE_UP                 | -1.66 | 0         | 0.045     |
| ZHENG_IL22_SIGNALING_UP                           | -1.66 | 0.01      | 0.045     |
| MAHADEVAN_GIST_MORPHOLOGICAL_SWITCH               | -1.66 | 0.017     | 0.045     |
| REACTOME_KERATAN_SULFATE_KERATIN_METABOLISM       | -1.66 | 0.013     | 0.045     |
| JOHANSSON_BRAIN_CANCER_EARLY_VS_LATE_DN           | -1.66 | 0.007     | 0.045     |
| SCIBETTA_KDM5B_TARGETS_DN                         | -1.66 | 0.007     | 0.046     |
| REICHERT_MITOSIS_LIN9_TARGETS                     | -1.66 | 0.022     | 0.046     |
| MCMURRAY_TP53_HRAS_COOPERATION_RESPONSE_DN        | -1.66 | 0.002     | 0.046     |
| MIKKELSEN_MCV6_LCP_WITH_H3K4ME3                   | -1.66 | 0         | 0.046     |

(Continued)

| <b>DiI Bright Enrichment</b>                                                                                                    |            |                  |                  |
|---------------------------------------------------------------------------------------------------------------------------------|------------|------------------|------------------|
| <b>GS</b>                                                                                                                       | <b>NES</b> | <b>NOM p-val</b> | <b>FDR q-val</b> |
| <b>follow link to MSigDB</b>                                                                                                    |            |                  |                  |
| LINDVALL_ IMMORTALIZED_BY_TERT_ DN                                                                                              | -1.66      | 0.002            | 0.046            |
| CLASPER_LYMPHATIC_ VESSELS_DURING_ METASTASIS_ DN                                                                               | -1.66      | 0.009            | 0.045            |
| PID_ LYMPHANGIOGENESIS_ PATHWAY                                                                                                 | -1.66      | 0.007            | 0.046            |
| LEE_AGING_ NEOCORTEX_ DN                                                                                                        | -1.66      | 0                | 0.046            |
| POMEROY_ MEDULLOBLASTOMA_ DESMOPLASIC_VS_ CLASSIC_ DN                                                                           | -1.65      | 0.007            | 0.048            |
| LA_MEN1_TARGETS                                                                                                                 | -1.65      | 0.013            | 0.048            |
| TARTE_PLASMA_CELL_VS_ PLASMABLAST_UP                                                                                            | -1.65      | 0                | 0.049            |
| <b>DiI Dull Enrichment</b>                                                                                                      |            |                  |                  |
| <b>GS</b>                                                                                                                       | <b>NES</b> | <b>NOM p-val</b> | <b>FDR q-val</b> |
| <b>follow link to MSigDB</b>                                                                                                    |            |                  |                  |
| MANALO_HYPOXIA_ DN                                                                                                              | 2.23       | 0                | 0.003            |
| REACTOME_RNA_POL_II_ TRANSCRIPTION                                                                                              | 2.14       | 0                | 0.01             |
| REACTOME_PROCESSING_ OF_CAPPED_INTRON_ CONTAINING_PRE_MRNA                                                                      | 2.12       | 0                | 0.009            |
| REACTOME_MRNA_ SPLICING                                                                                                         | 2.1        | 0                | 0.01             |
| SCHLOSSER_MYC_ TARGETS_AND_SERUM_ RESPONSE_ DN                                                                                  | 2.09       | 0                | 0.009            |
| REACTOME_MRNA_ PROCESSING                                                                                                       | 2.08       | 0                | 0.009            |
| Genes up-regulated in epithelial-like melanoma cell line vs mesenchymal-like cell lines (Supplementary Table S1, current study) | 2.07       | 0                | 0.001            |
| WALLACE_JAK2_ TARGETS_UP                                                                                                        | 2.03       | 0                | 0.017            |

| DiI Bright Enrichment                               |      |           |           |
|-----------------------------------------------------|------|-----------|-----------|
| GS                                                  | NES  | NOM p-val | FDR q-val |
| <b>follow link to MSigDB</b>                        |      |           |           |
| REACTOME_METABOLISM_OF_NON_CODING_RNA               | 2.03 | 0         | 0.015     |
| REACTOME_ELONGATION_ARREST_AND_RECOVERY             | 2    | 0         | 0.022     |
| PICCALUGA_ANGIOIMMUNOBLASTIC_LYMPHOMA_DN            | 1.99 | 0         | 0.021     |
| PID_MAPKTRKPATHWAY                                  | 1.98 | 0         | 0.024     |
| SCHUHMACHER_MYC_TARGETS_UP                          | 1.96 | 0         | 0.027     |
| KEGG_SPLICEOSOME                                    | 1.95 | 0         | 0.029     |
| REACTOME_HIV_LIFE_CYCLE                             | 1.94 | 0         | 0.031     |
| MMS_MOUSE_LYMPH_HIGH_4HRS_UP                        | 1.93 | 0         | 0.034     |
| REACTOME_LATE_PHASE_OF_HIV_LIFE_CYCLE               | 1.93 | 0         | 0.032     |
| REACTOME_RNA_POL_III_TRANSCRIPTION                  | 1.93 | 0         | 0.03      |
| GARCIA_TARGETS_OF_FLI1_AND_DAX1_DN                  | 1.9  | 0         | 0.042     |
| MUELLER_PLURINET                                    | 1.9  | 0         | 0.04      |
| REACTOME_FORMATION_OF_RNA_POL_II_ELONGATION_COMPLEX | 1.9  | 0.002     | 0.039     |
| PID_ATM_PATHWAY                                     | 1.89 | 0.002     | 0.042     |
| PID_ATF2_PATHWAY                                    | 1.88 | 0         | 0.041     |
| REACTOME_MRNA_SPLICING_MINOR_PATHWAY                | 1.88 | 0         | 0.041     |
